1 **Free energy landscape for the entire transport cycle of**  
2 **triose-phosphate/phosphate translocator**

3 Mizuki Takemoto<sup>1</sup>, Yongchan Lee<sup>1</sup>, Ryuichiro Ishitani<sup>1,2\*</sup>, Osamu Nureki<sup>1\*</sup>

4 <sup>1</sup>*Department of Biophysics and Biochemistry, Graduate School of Science, The*

5 *University of Tokyo, 2-11-16 Yayoi, Bunkyo-ku, Tokyo 113-0032, Japan.*

6 <sup>2</sup>*Theoretical Molecular Science Laboratory, RIKEN, Wako, Saitama 351-0198, Japan.*

7 \*To whom reprint requests should be addressed: Phone: +81-3-5841-4392; E-mails:

8 [ishitani@bs.s.u-tokyo.ac.jp](mailto:ishitani@bs.s.u-tokyo.ac.jp) and [nureki@bs.s.u-tokyo.ac.jp](mailto:nureki@bs.s.u-tokyo.ac.jp)

## 9 **Abstract**

10           Secondary active transporters translocate their substrates using the  
11 electrochemical potentials of other chemicals, undergoing large-scale conformational  
12 changes. Despite extensive structural studies, the atomic details of the transport  
13 mechanism still remain elusive. Here we performed a series of all-atom molecular  
14 dynamics simulations of the triose-phosphate/phosphate translocator (TPT), which  
15 exports organic phosphates in the chloroplast stroma in strict counter exchange with  
16 inorganic phosphate ( $P_i$ ). Biased sampling methods, including string method and  
17 umbrella sampling, successfully reproduced the conformational changes between the  
18 inward- and outward-facing states, along with the substrate binding. The free energy  
19 landscape of this entire TPT transition pathway demonstrated the alternating access and  
20 substrate translocation mechanisms, which revealed  $P_i$  is relayed by positively charged  
21 residues along the transition pathway. Furthermore, the conserved Glu207 functions as a  
22 “molecular switch”, linking the local substrate binding and the global conformational  
23 transition. Our results provide atomic-detailed insights into the energy coupling  
24 mechanism of antiporter.

## 25 Introduction

26 Membrane transporters function as gatekeepers that permeate hydrophilic  
27 metabolites through a lipid bilayer. The secondary active transporters catalyze the  
28 uptake of compounds essential for cells or organelles or the elimination of unnecessary  
29 compounds, using the electrochemical potential of another compound. Generally, these  
30 active transporters achieve the transport of substrates by undergoing conformational  
31 transitions between the inward-facing (IF) state, the outward-facing (OF) state, and their  
32 intermediate, the occluded (Occ) state. This mechanism, called the alternating access  
33 mechanism(Drew & Boudker, 2016; Jardetzky, 1966), is universally required for all  
34 active transporters, since opening the gates on both sides of the membrane would permit  
35 the free diffusion of the substrate across the membrane and hinder the energy coupling.  
36 Although the energy coupling mechanism of membrane transporters is essential for all  
37 cells and organelles, the molecular basis of the energy coupling for almost all  
38 transporters remains elusive.

39 The plastidic phosphate translocator (pPT) family is one of the membrane  
40 transporter groups that exchanges phosphorylated C3, C5 and C6 carbon sugars with  
41 inorganic phosphate ( $P_i$ ) on the inner membrane of the plastid in plant and alga  
42 cells(Knappe, Flügge, & Fischer, 2003; Weber & Linka, 2011). The pPT family is  
43 further divided into four subfamilies, TPT, GPT, XPT and PPT, according to their  
44 substrate specificities for triose-phosphate, glucose-6-phosphate, xylulose-5-phosphate  
45 and phosphoenolpyruvate, respectively(Eicks, Maurino, Knappe, Flügge, & Fischer,  
46 2002; Fischer et al., 1997; Kammerer et al., 1998; Weber & Linka, 2011). The  
47 triose-phosphate/phosphate translocator (TPT) family in green plants exports triose

48 phosphates and 3-phosphoglyceric acids (3-PGA) produced by photosynthesis and  
49 imports  $P_i$  into stroma(U.-I. Flügge et al., 1991; U. I. I. Flügge et al., 1989; Weber &  
50 Linka, 2011). Thus, TPT contributes to efficient carbon fixation and plant  
51 growth(Hattenbach, Muller-Rober, Nast, & Heineke, 1997; Häusler, Schlieben, Nicolay,  
52 et al., 2000; Häusler, Schlieben, & Flügge, 2000; Heineke et al., 1994; Riesmeier et al.,  
53 1993; Schneider et al., 2002). Each pPT subfamily catalyzes the strict 1:1 counter  
54 exchange of phosphorylated carbon compounds with  $P_i$  to ensure phosphate  
55 homeostasis between the stroma and the cytosol(Fliege, Flügge, Werdan, & Heldt, 1978;  
56 Weber, Schwacke, & Flügge, 2005). They can also mediate  $P_i/P_i$  exchange in a  
57 reconstituted system, such as liposomes(Linka, Jamai, & Weber, 2008).

58         Recently, we reported the crystal structure of GsGPT from the thermophilic red  
59 alga *Galdieria sulphuraria*(Lee et al., 2017), which is functionally similar to TPT, rather  
60 than GPT, despite its name based on the sequence similarity(Linka et al., 2008). GsGPT  
61 is composed of 10  $\alpha$ -helical transmembrane (TM) helices (Figure 1a), and adopts the  
62 drug metabolite transporter (DMT) superfamily(Jack, Yang, & H. Saier, 2001) fold,  
63 similar to that of the recently reported bacterial metabolite transporter, *Starkeya novella*  
64 YddG (SnYddG)(Tsuchiya et al., 2016), in which the N-terminal half (TM1-5) is related  
65 to the C-terminal half (TM6-10) by two-fold pseudo-symmetry. We obtained the two  
66 crystal structures bound with different substrates,  $P_i$  and 3-PGA (Figure 1b and Figure  
67 1—figure supplement 1). In both crystal structures, the phosphate moieties of the  
68 substrates are recognized by the well-conserved basic residues, Lys204, Lys362, and  
69 Arg363 (Figure 1b). This central substrate binding site is occluded from the solvent by  
70 hydrophobic residues, referred to as the inside and outside gates (Figure 1c). These  
71 observations indicated that the crystal structure represents a substrate-bound Occ state.

72 The structural comparison with SnYddG in the OF state revealed the basis of the  
73 transport mechanism, in which the opening and closing of these gates regulate the IF  
74 and OF conformational changes(Lee et al., 2017). However, the detailed mechanisms of  
75 the conformational changes and the substrate binding/releasing by the DMT superfamily  
76 have remained elusive.

77 Molecular dynamics (MD) simulations have been used to study the dynamics  
78 and conformational transitions of various membrane transporters(Khalili-Araghi et al.,  
79 2009; Shaikh et al., 2013). Our previous MD simulation, in which the substrate was  
80 removed from the crystal structure of GsGPT, showed the rapid conformational change  
81 from the Occ state to the IF and OF states, and provided insights into the transport  
82 mechanism of GsGPT(Lee et al., 2017). Generally speaking, a conventional MD  
83 simulation cannot sample a large and slow conformational change in the limited  
84 computational time, because of the high free energy barriers between the states. In fact,  
85 our previous MD simulation of the substrate-bound GsGPT did not reveal any  
86 significant conformational change in the 100-ns timescale(Lee et al., 2017). However, in  
87 the physiological transport cycle, spontaneous conformational changes between the Occ  
88 and IF/OF states, as well as the binding and release of the substrate (Figure 1d), actually  
89 occur in a much longer time scale, which is not accessible by the conventional MD  
90 simulation methods.

91 This problem can be solved by employing biased sampling methods, such as  
92 umbrella sampling(Torrie & Valleau, 1977). In this study, we used bias-exchange  
93 umbrella sampling (BEUS)(Moradi, Enkavi, & Tajkhorshid, 2015; Moradi &  
94 Tajkhorshid, 2014; Sugita, Kitao, & Okamoto, 2000), an umbrella sampling method  
95 combined with Hamiltonian replica exchange sampling(Sugita et al., 2000), which can

96 perform more efficient sampling than normal umbrella sampling. To find the optimum  
97 transition pathway of the entire transport cycle of GsGPT, we employed the string  
98 method with swarms of trajectories (SMwST)(Pan, Sezer, & Roux, 2008) path-finding  
99 algorithm. By combining these sampling techniques, we achieved the *in silico*  
100 reconstruction of a feasible transport cycle for GsGPT in the explicit solvent and lipid  
101 bilayer, and we observed the substrate binding and releasing events for the first time for  
102 the DMT superfamily transporters. Comprehensive structural analyses revealed the  
103 strict 1:1 exchange mechanism of GsGPT in atomic detail. We found the unexpected  
104 common feature of the conformational transition mechanisms with the well-studied  
105 major facilitator superfamily (MFS) transporters(Quistgaard, Löw, Guettou, &  
106 Nordlund, 2016), despite their completely different protein folding. Along with the  
107 computational simulations, our functional analysis of the mutants provided  
108 experimental evidence supporting the MD simulation observations. Taken together, we  
109 revealed the atomistic molecular mechanism of GsGPT, which involves the structural  
110 coupling between the local conformational change induced by substrate binding and the  
111 global conformational transition of the transporter.

112

## 113 Results

### 114 Reconstruction of the GsGPT transport cycle

115 To reconstruct the GsGPT transport cycle, we first tried to find the reaction  
116 coordinates (collective variables) to induce the conformational transition of GsGPT.  
117 Various trials revealed that two distance parameters,  $D_{in}$  and  $D_{out}$ , were sufficient to  
118 induce the transition to the IF and OF states from the Occ state crystal structure (Figure  
119 1—figure supplement 2b-e), where  $D_{in}$  and  $D_{out}$  represent the center of mass distances  
120 between the  $C\alpha$  atoms of the inside and outside gate residues, respectively (see Methods  
121 for a detailed definition). Moreover, the one-dimensional collective variable,  $\Delta D = D_{out}$   
122  $- D_{in}$ , can also be used to induce the conformational change from IF to OF (Figure  
123 1—figure supplement 2f). For simplicity, we used this  $\Delta D$  to describe the  
124 conformational space of GsGPT. Another reaction coordinate for the transition cycle is  
125 the position of  $P_i$  along the membrane normal axis, referred to as  $Z_{P_i}$  (Figure 1—figure  
126 supplement 2a). Finally, we performed 12 sets of biased samplings in the  
127 two-dimensional collective variable space,  $\Delta D$  and  $Z_{P_i}$ .

128 The reconstruction of the transport cycle is performed by the following steps  
129 (Figure 1e): first of all, we performed the non-equilibrium pulling to induce the  
130 transitions from Occ to  $IF_b^{cent}$  and  $OF_b^{cent}$  (IF- and OF-bound at the central binding site,  
131 respectively) (Figure 1d), using the collective variable  $\Delta D$  (simulation sets 1 and 2 in  
132 Table 1). The subsequent non-equilibrium pulling for  $Z_{P_i}$  was performed to generate the  
133 structures in which  $P_i$  is bound near the gate,  $IF_b^{intra}$  (IF-bound at intracellular gate) and  
134  $OF_b^{extra}$  (OF-bound at extracellular gate) (simulation sets 3 and 4). To search the  
135 minimum free energy pathway of the  $IF_b^{intra} \leftrightarrow Occ \leftrightarrow OF_b^{extra}$  transition in the  $\Delta D - Z_{P_i}$

136 two-dimensional space, we employed the string method with swarms of trajectories  
137 (SMwST)(Pan et al., 2008) (simulation set 5), followed by the free energy calculation  
138 with a set of bias exchange umbrella sampling (BEUS)(Moradi et al., 2015; Moradi &  
139 Tajkhorshid, 2014; Sugita et al., 2000) along the refined transition string (simulation set  
140 6) using “path collective variables” (pathCV(s) and pathCV( $\zeta$ ); equations (1) and  
141 (2))(Branduardi, Gervasio, & Parrinello, 2007). Next, to obtain the *apo* states of GsGPT,  
142 IF<sub>a</sub> and OF<sub>a</sub> in Figure 1c, we pulled the P<sub>i</sub> from the IF<sub>b</sub><sup>cent</sup> and OF<sub>b</sub><sup>cent</sup> states to the bulk  
143 solvent region (simulation sets 7 and 9), and performed free energy calculations along  
144 the Z<sub>P<sub>i</sub></sub> variable (simulation sets 8 and 10). The results of these three sets of free energy  
145 calculations were combined with the recently developed *post-hoc* string method  
146 (PHSM)(Moradi et al., 2015) to estimate the minimum free energy pathway for the full  
147 transition cycle, IF<sub>a</sub> ↔ Occ ↔ OF<sub>a</sub>. The extracted transition pathway was further  
148 refined with SMwST (simulation set 11). Finally, the free energy calculation for the  
149 entire transport cycle (simulation set 12) was performed along this optimized transition  
150 pathway, using pathCV(s) and pathCV( $\zeta$ ). We obtained the entire transport cycle of  
151 GsGPT with 1,000,000 configurations, and calculated the free energy along the  
152 optimum transition pathway using the weighted histogram analysis method  
153 (WHAM)(Kumar, Rosenberg, Bouzida, Swendsen, & Kollman, 1992) (Figure 1f and  
154 Video 1). (For detailed parameters of the simulations, see Methods.)

155

## 156 **Overall conformational change of GsGPT**

157 To investigate the overall conformational change of GsGPT, representative  
158 structures corresponding to the free energy basins of the IF<sub>a</sub> and OF<sub>a</sub> states (Figure 1f)



159 were compared with that of the Occ state (Figure 2a, b). The major differences between  
160 the IF and OF states were the outward-gate distance between the hairpin of TM3-4 and  
161 TM1 (Figure 2a), and the inward-gate distance between the hairpin of TM8-9 and TM6  
162 (Figure 2b). The superimposition of the IF<sub>a</sub> and OF<sub>a</sub> states onto the Occ state revealed  
163 that the TM bundles composed of TM1, 8 and 9 (bundle1) and TM6, 3 and 4 (bundle2)  
164 are directly involved in the overall conformational change. In contrast, the other helices  
165 (TM2, 5, 7 and 10) do not participate in the open/closed conformational changes, and  
166 function as a scaffold for the conformational changes of bundle1 and bundle2. Hereafter,  
167 we refer to bundle1 and bundle2 (*i.e.*, TM1, 3, 4, 6, 8, and 9) as the core domain.

168 The molecular surfaces for the representative structures illustrate that the  
169 substrate binding site is exposed to opposite sides of the membrane in an alternating  
170 fashion, known as the alternating access mechanism (Drew & Boudker, 2016; Jardetzky,  
171 1966) (Figure 2c). To confirm whether all of the structures obtained from the simulation  
172 satisfy the alternating access mechanism, we performed pore radius calculations along  
173 the transport pathway by HOLE (Smart, Neduvélil, Wang, Wallace, & Sansom, 1996) for  
174 all structures obtained from the simulation (for representative results, see Figure  
175 2—figure supplement 1). The outward and inward minimum radii were defined as the  
176 minimum radii of the pore in the regions of  $-20 < z < -7$  and  $7 < z < 20$ , respectively, where  $z$   
177 represents the coordinate along the pore pathway ( $z = 0$  corresponds to the central  
178 binding site, and  $z > 0$  corresponds to the outward direction). The plot of the outward *vs.*  
179 inward minimum radii illustrates that the conformational transition between the IF and  
180 OF states always visits the Occ-state region, and none of the structures visit the region  
181 where the substrate binding site is exposed to both the inward- and outward-side solvent  
182 (Figure 2d). This result indicates that the obtained transition pathway satisfies the

183 alternating access, suggesting the validity of the simulated transition pathway.

184         Next, to reveal the mechanism of the overall conformational change, we  
185 investigated the internal conformational change within the core domain helices, bundle1  
186 and bundle2. Bundle1 and bundle2 in the IF<sub>a</sub> conformation both superimpose well onto  
187 those in the OF<sub>a</sub> conformation, respectively (Figure 2—figure supplement 2a, b),  
188 suggesting the semi-rigid body movement of the core domains along the transport cycle.  
189 In fact, the distributions of the root-mean-square deviation (RMSD) values of the  
190 bundle1 and bundle2 C $\alpha$  atoms against the crystal structure illustrated that the RMSD  
191 values for only bundle1 or bundle2 remained lower than that of bundle1+2 over the  
192 entire transport cycle (Figure 2—figure supplement 2c). These results suggest that the  
193 conformational transition between IF and OF is governed by the semi-rigid body tilting  
194 motions of bundle1 and bundle2, rather than the internal bending and straightening  
195 motion of the TM helices. To confirm this mechanism, we projected the free energy  
196 onto the two-dimensional space consisting of the first principal component of the C $\alpha$   
197 atoms, or PC1 (Figure 2—figure supplement 3a-c), and the inter-helical angle between  
198 TM1 and TM6 (Figure 2e). The PC1 correlates well with the  $\Delta D$ , pathCV(s), and replica  
199 number (Figure 2—figure supplement 3d-f), and represents the global conformational  
200 transition as well as the  $\Delta D$ . The inter-helical angle between TM1 and TM6 represents  
201 the inter-domain angle between bundle1 and bundle2. This free energy landscape shows  
202 three distinct free energy basins corresponding to the IF, Occ and OF states, suggesting  
203 that the tilting motions of bundle1 and bundle2 play a major role in the overall  
204 conformational change.

205         These results are in contrast with the previously suggested mechanism  
206 hypothesized from the static crystal structures of SnYddG and GsGPT, in which the

207 bending motion of the TM helices governs the conformational transition(Lee et al.,  
208 2017). In the previous report of the bacterial DMT superfamily transporter, SnYddG,  
209 the bending and straightening of the core bundle, especially TM3-4 and TM8-9, were  
210 suggested to regulate the opening and closing of the inside and outside gates(Tsuchiya  
211 et al., 2016). However, the present results suggest that the tilting motion of the  
212 semi-rigid core domain, which resembles the rocker-switch mechanism proposed for the  
213 MFS transporters(Huang, Lemieux, Song, Auer, & Wang, 2003; Law, Maloney, & Wang,  
214 2008), is sufficient to explain the conformational transition of GsGPT. Thus, the  
215 alternating access mechanism of the DMT superfamily is unexpectedly similar to that of  
216 the MFS transporters, despite their completely different TM topologies.

217

### 218 **Hydrogen bonds at the inside and outside gates are dispensable for the** 219 **conformational change**

220 In the crystal structure of GsGPT, the well conserved Lys271 and Lys128  
221 residues form hydrogen bonds with the main chain carbonyl atoms on the opposite  
222 bundle, and lock the inside and outside gates, respectively (Figure 3a). In our previous  
223 analysis based on the structural comparison with SnYddG, the disruption and formation  
224 of these hydrogen bonds were suggested to regulate the gate opening and closing(Lee et  
225 al., 2017). However, in the present simulation, the two hydrogen bonds of Lys128  
226 shown in Figure 3a were not always maintained, even in the IF state (Figure 3b; cyan),  
227 and the two hydrogen bonds of Lys271 were also not always maintained, even in the OF  
228 state (Figure 3b; magenta). Furthermore, the liposome-based transport assays of K271A,  
229 K128A and their double mutant revealed that all of these mutants still retain the  $P_i/P_o$

230 homo-exchange activity, as compared with the previously reported mutants in the  
231 substrate binding site, K204A, K362A and R363A(Lee et al., 2017) (Figure 3c). These  
232 results suggest that the hydrogen bond formation by Lys271 or Lys128 is not crucial for  
233 the conformational change. Our investigations are consistent with the previous  
234 functional analysis of the GsGPT homologue, the apicoplast phosphate translocator of  
235 *Toxoplasma gondii* (TgAPT), which revealed that the K67A mutation of TgAPT,  
236 corresponding to the K128A mutation of GsGPT, retained 10-20% activity(Brooks et al.,  
237 2010). Our simulation suggests that Lys128 and Lys271 play another role in the  
238 conformational transition of GsGPT, rather than the regulation of gate opening and  
239 closing by hydrogen bond formation.

240

## 241 **Substrate binding and translocation mechanism**

242 To gain detailed insight into the mechanism for substrate binding and  
243 translocation, we projected the free energy onto the PC1-  $Z_{P_i}$  plane, and compared the  
244 representative structures of the free energy basins (Figure 4). The translocation of  $P_i$   
245 from the outside (intermembrane side) to the inside (stroma side) can be described by  
246 the following reaction steps (Video 1). (i) At first,  $P_i$  in the outside solution is captured  
247 by the positively charged residues, and passed to Lys128 (Figure 4a and Figure  
248 4—figure supplement 1a). (ii) In addition to Lys128,  $P_i$  is captured by Lys204, one of  
249 the central substrate binding residues (Figure 4b and Figure 4—figure supplement 1b).  
250 (iii) The salt bridge between  $P_i$  and Lys128 is disrupted, and then  $P_i$  binds to Lys362 and  
251 Arg363 (Figure 4c and Figure 4—figure supplement 1c, d). (iv) The hydrogen bond  
252 between  $P_i$  and Tyr339 on TM9 is formed (Figure 4d and Figure 4—figure supplement

253 1e), which enables the outward halves of the core domains to approach each other, and  
254 the conformational change from the OF to Occ states is facilitated. (Figure 4d). This  
255 configuration is the most stable state in our simulation (Figure 1f and Figure 4),  
256 consistent with the fact that the two crystal structures of GsGPT were obtained in the  
257 substrate-bound Occ state. Note that two distinct configurations were degenerate in this  
258 Occ state in terms of the binding modes of Arg266: in one state, Arg266 binds to  $P_i$  with  
259 a water-mediated indirect interaction, as observed in the crystal structure (Figure  
260 4—figure supplement 2a); in the other, Arg266 directly forms a salt bridge with  $P_i$   
261 (Figure 4—figure supplement 2b). These two states can be discriminated by the slight  
262 difference of  $Z_{P_i}$ , and this difference might determine the direction of the  
263 conformational transition from the Occ state to the IF or OF state. (v) The inside gate is  
264 disrupted, and the conformational change from the Occ to IF state occurs (Figure 4e).  
265 (vi)  $P_i$  is dissociated from the central binding site and bound to both Arg266 and Lys271  
266 (Figure 4f and Figure 4—figure supplement 1f, g). (vii) The salt bridge between  $P_i$  and  
267 Arg266 is disrupted, and  $P_i$  is released to the inside solution mediated by Lys271 and  
268 other basic residues located on the inward surface, *e.g.* Lys400 (Figure 4g). Each free  
269 energy basin corresponds to a distinct substrate binding mode, and the transport  
270 mechanism can be explained as the relaying of  $P_i$  by these pore lining, basic residues  
271 (except for Tyr339). The free energy barriers between the  $P_i$  binding modes correspond  
272 to the energy required for disrupting the salt bridge between  $P_i$  and these basic residues.

273 The minimum distance plot between  $P_i$  and these pore lining residues shows  
274 that the residues in the central binding site, Lys204, Tyr339, Lys362 and Arg363,  
275 interact strongly with the substrate in all of the OF, Occ and IF states (Figure 4—figure  
276 supplement 1b-e). This observation is consistent with our previous mutational analysis,

277 in which the mutations of these residues, K204A, Y339F, K362A and R363A, abolished  
278 the  $P_i/P_i$  homo-exchange activity(Lee et al., 2017). It is also interesting to note that  
279 Lys271 and Lys128 in the inside and outside gates strongly interact with  $P_i$  in the  
280 transport cycle. Given that the hydrogen bond formation of Lys128 and Lys271 is  
281 dispensable for the conformational transition (Figure 3), the decreases of the transport  
282 activity in the K128A, K271A and K128A/K271A mutants may be due to the loss of  
283 these interactions. Thus, we can conclude that Lys128 and Lys271 primarily function as  
284 the initial binding sites for the substrates, rather than in the inside and outside gate  
285 formation. To further support this relaying mechanism of  $P_i$ , we performed an additional  
286 mutational analysis of GsGPT using the liposome-based assay (Figure 4h). The result  
287 revealed that the R266A mutant also completely abolishes the  $P_i$  exchanging activity,  
288 showing the importance of Arg266 for the transport mechanism. In addition, the  
289 conservative mutants, R266K and R363K, exhibited significantly decreased activities  
290 (Figure 4h), suggesting that the shapes of these side chains are also important for the  
291 recognition of the tetrahedral arrangement of the substrate.

292

## 293 **Coupling mechanism of substrate binding and protein conformational** 294 **change**

295 To reveal the conformational coupling mechanism of GsGPT, we focused on  
296 Glu207 on TM4, which is the only conserved acidic residue in the positively-charged  
297 substrate binding pocket (Figure 5a). Calculations of the minimum distances between  
298 the neighboring basic residues, Lys204 and Arg363, revealed that Glu207 exchanges its  
299 salt bridge partner during the transport cycle (Figure 5a, b). In the  $IF_a$  state, Glu207

300 mainly forms an intra-helical salt bridge with Lys204 (Fig 5b; magenta line). This  
301 intra-helical salt bridge fixes the side chain of Lys204 to the Glu207 side, thereby  
302 causing the electrostatic repulsion between Lys204 and Arg363 to prevent the  
303 conformational transition to Occ and stabilize the IF conformation (Figure 5a; left). By  
304 contrast, in the OF<sub>a</sub> state, Glu207 forms a stable inter-helical salt bridge with Arg363 on  
305 TM9 (Fig 5b; cyan line). This inter-helical salt bridge between Glu207 and Arg363  
306 clamps the inward halves of TM4 and TM9 together (Figure 5a; right), thereby fixing  
307 the arrangement of bundle1 and bundle2 to the OF conformation. P<sub>i</sub> binding to these  
308 basic residues weakens the salt bridges between the basic residues and Glu207, which  
309 may facilitate the exchange of the salt bridge partner of Glu207 (Figure 5a; center).

310         This salt-bridge rearrangement involving Glu207 leads to a plausible mechanism  
311 of the conformational coupling, which can explain how the local conformational change  
312 upon the substrate binding is amplified to the global motions of bundle1 and bundle2. In  
313 this mechanism, Glu207 plays a role as a “switch” that turns on the global tilting  
314 motions of TM4 and TM9 upon substrate binding. Since TM4 and TM9 constitute the  
315 (semi-)rigid bodies of bundle1 and bundle2, respectively, these tilting motions of TM4  
316 and TM9 directly result in the global IF/OF conformational change of GsGPT (Figure  
317 5—figure supplement 1). This mechanism is in contrast to our previous working model  
318 based on the static crystal structure, in which the electrostatic repulsion by the  
319 positively charged residues in the substrate binding pocket is simply neutralized by the  
320 binding of the negatively-charged substrate, thereby enabling the global IF/OF  
321 conformational change(Lee et al., 2017). To further support the importance of Glu207,  
322 we performed liposome-based assays of Glu207 mutants. The results revealed that the  
323 E207A mutation abolishes the P<sub>i</sub>/P<sub>i</sub> homo-exchange activity (Figure 5c), in spite of its

324 stable membrane expression (Figure 3—figure supplement 2). Moreover, the  
325 conservative mutation, E207D, significantly reduces the exchange activity (Figure 5c),  
326 probably due to the insufficient side chain length to form the salt bridge network (Figure  
327 5a). Taken together, in addition to the previous mechanism based on the electrostatic  
328 repulsion and neutralization, the switch mechanism by Glu207 plays a pivotal role in  
329 the coupling mechanism of the local and global conformational changes, thus allowing  
330 the strict 1:1 exchange of the substrates by GsGPT.

331



## 332 Discussion

333 Our simulation, combining string method and umbrella sampling, successfully  
334 reconstructed the entire transport cycle of GsGPT from a single crystal structure. The  
335 computational analysis for all configurations obtained from the simulation revealed the  
336 antiport mechanism of GsGPT in atomic detail.

337 In the current study, we used a highly symmetric substrate,  $P_i$ , to simplify the  
338 collective variable used in the simulations. However, we can gain insight into other pPT  
339 family protein substrates that have more complicated structures, such as 3-PGA.  
340 Although pPT family proteins transport various types of phosphosugars, depending on  
341 their subtypes(Lee et al., 2017; Weber & Linka, 2011), all of the substrates have a  
342 common structural feature: one oxygen atom of  $P_i$  is replaced with a sugar moiety. In  
343 our simulation, the substrate binding pocket in all of the binding modes can  
344 accommodate a compound in which one oxygen atom of  $P_i$  is replaced with a sugar  
345 moiety (Figure 4a-g), as observed in our previous 3-PGA bound crystal structure(Lee et  
346 al., 2017). In addition, our previous study revealed that the recognition and  
347 discrimination of the sugar moiety of the substrates is achieved by the side chains  
348 located on the opposite side of the  $P_i$  binding residues, such as His185 (Figure 1—figure  
349 supplement 1b), which are not involved in the currently proposed transport mechanisms.  
350 The conformational transition is regulated by the binding of the phosphate moiety, and  
351 the binding manner of the phosphate moiety is the same in both the  $P_i$  and 3-PGA bound  
352 crystal structures(Lee et al., 2017) (Figure 1 and Figure 1—figure supplement 1).  
353 Therefore, it is highly likely that the transport mechanism of other substrates by GsGPT  
354 is similar to that of  $P_i$  observed in our simulations. Moreover, given that the  $P_i$  binding

355 residues observed in our simulation (Lys128, Lys204, Arg266, Lys271, Tyr339, Lys362  
356 and Arg363) are well conserved among the pPT family members(Lee et al., 2017), and  
357 that the free energy landscape is governed almost entirely by the binding mode of  $P_i$  to  
358 these conserved residues, all of the transporters belonging to the pPT family may have  
359 similar free energy landscapes to that of GsGPT (Figure 4). Thus, our results can be  
360 generalized to the transport mechanism for all pPT family transporters.

361 Our previous research on the bacterial DMT superfamily protein, SnYddG,  
362 revealed that the best-characterized small drug resistance (SMR) family protein, *E. coli*  
363 EmrE(Chen et al., 2007; Henzler-Wildman, 2012), shares a similar TM topology with  
364 SnYddG, suggesting an evolutionary relationship between SMR and other DMT  
365 proteins(Tsuchiya et al., 2016). EmrE forms a dimer of four TM segments, and  
366 exchanges protons and cationic drugs(Chen et al., 2007; Henzler-Wildman, 2012). The  
367 structural comparison of EmrE with SnYddG and GsGPT revealed that EmrE lacks the  
368 TM helices corresponding to TM2 and TM7 in SnYddG and GsGPT(Tsuchiya et al.,  
369 2016). Our simulation showed that these TM helices work as a scaffold, and are not  
370 directly involved in the conformational transition. Thus, the transport mechanism of  
371 EmrE can also be explained as the rocker-switch movement of a pair of three TM  
372 bundles (TM1, 2 and 3 of each protomer), corresponding to bundle1 and bundle2 of  
373 GsGPT (Figure 2c).

374 It is worth comparing the conformational regulation mechanism of GsGPT with  
375 that of GlpT, which belongs to MFS and functions as a glycerol-3-phosphate/ $P_i$   
376 exchanger(Huang et al., 2003; Law, Maloney, et al., 2008). GlpT has a different  
377 evolutionary origin and protein folding from those of GsGPT, but is functionally similar  
378 to GsGPT. The previous biochemical and MD simulation studies(Law, Almqvist, et al.,

379 2008; Moradi et al., 2015) revealed that the inter- and intra-domain salt bridges between  
380 two basic (R45 and K46) and two acidic (D274 and E299) residues stabilize the  
381 different conformations during the transport cycle, and substrate binding weakens these  
382 interactions, allowing the conformational transition. In the case of GsGPT, our  
383 simulations revealed that the inter- and intra-helical salt bridges involving Glu207,  
384 which connect bundle1 and bundle2, stabilize the IF and OF conformations (Figure 5),  
385 and these interactions are weakened by substrate binding. Furthermore, the overall  
386 conformational change is described by the rocker-switch motions of bundle1 and  
387 bundle2 (Figure 2), which are widely observed in MFS transporters, including  
388 GlpT(Huang et al., 2003; Law, Maloney, et al., 2008). Therefore, the conformational  
389 change mechanism by the rocker switch motion and the conformational regulation  
390 mechanism by the salt bridge formation and disruption in GlpT and GsGPT are quite  
391 similar to each other. These similarities between GlpT and GsGPT over protein  
392 superfamily, in terms of both functions and mechanisms, may represent an example of  
393 the convergent evolution of the transporter mechanisms.

394

## 395 **Methods**

### 396 **Simulation system setup**

397 All MD simulations were performed with NAMD 2.9-2.11(Phillips et al., 2005),  
398 along with its Colvars Module(Fiorin, Klein, & Hénin, 2013). The simulation system  
399 was 96x96x100 Å<sup>3</sup>, and contained GsGPT (PDB ID: 5Y78), a molecule of P<sub>i</sub>, a POPC  
400 bilayer, 150 mM NaCl, and TIP3 water molecules. All of the water molecules that were  
401 visible in the crystal structure were kept. The missing hydrogen atoms were added by  
402 the psfgen plugin of VMD(Humphrey, Dalke, & Schulten, 1996). The net charge of the  
403 system was neutralized by adding 150 mM NaCl. The molecular topology and force  
404 field parameters from Charmm36 were used(Best et al., 2012; Klauda et al., 2010). The  
405 systems were first energy minimized for 1,000 steps with fixed positions of the  
406 non-hydrogen atoms, and then for another 1,000 steps with 10 kcal/mol restraints for the  
407 non-hydrogen atoms, except for the lipid molecules within 5.0 Å from the protein. Next,  
408 equilibrations were performed for 0.1 ns under NVT conditions, with 10 kcal mol<sup>-1</sup> Å<sup>-2</sup>  
409 restraints for the heavy atoms of the protein. Finally, equilibration was performed for  
410 1.0 ns under NPT conditions with the 1.0 kcal mol<sup>-1</sup> Å<sup>-2</sup> restraints for all C $\alpha$  atoms of  
411 the protein, followed by a 100 ns equilibration without the restraints. The equilibrated  
412 system was further used for the next simulation, as indicated in Table 1 and below. For  
413 all simulations in Table 1, the SHAKE algorithm was used to constrain all  
414 hydrogen-containing bonds to enable a 2 fs timestep. Constant temperature was  
415 maintained with Langevin dynamics at 310 K, and constant pressure was maintained  
416 with a Nosé -Hoover Langevin piston(Feller, Zhang, Pastor, & Brooks, 1995) at 1 bar.  
417 Electrostatic interactions were calculated by the particle mesh Ewald method(Darden,

418 York, & Pedersen, 1993).

419

## 420 **Collective variables**

421 In order to induce the conformational change from the Occ state crystal structure,  
422 we used the collective variables of  $\Delta D$  and  $Z_{P_i}$ .  $\Delta D$  was defined as follows:  $\Delta D =$   
423  $D_{\text{out}} - D_{\text{in}}$ , where  $D_{\text{out}}$  was defined as the distance between the  $C\alpha$  mass centers of the  
424 two residue groups, 126-130 and 191-200, and  $D_{\text{in}}$  was defined as the distance between  
425 the  $C\alpha$  mass centers of the two residue groups, 269-273 and 347-355.  $Z_{P_i}$  was used to  
426 track the position of the substrate  $P_i$ , and defined as the projection of the distance vector  
427 between the phosphorus atom of  $P_i$  and the reference point onto the membrane normal  
428 axis. The reference point of  $Z_{P_i}$  was defined as the center of mass of the  $C\alpha$  atoms of the  
429  $P_i$  binding residues in the crystal structure, *i.e.*, K204, K362 and R363. In all of our  
430 simulations,  $P_i$  was also restrained within a cylinder with a 10 Å radius, which was  
431 aligned to the membrane normal axis and centered to the mass center of the protein,  
432 using a half-harmonic potential with a spring constant of 10 kcal mol<sup>-1</sup> Å<sup>-2</sup>.

433 To sample the configurations for the entire transport cycle of GsGPT, we used  
434 the following strategy. Generally, it is difficult to sample sufficiently in an  
435  $n$ -dimensional collective variable space,  $(z_1, z_2, \dots, z_n) = \{\mathbf{z}\}$ , due to the computational  
436 cost. A practical solution is to perform the sampling only around a particular pathway  
437 (or string),  $s(\{\mathbf{z}\})$ . In this study, we explored the minimum free energy path of the  
438 transport pathway with the string method with the swarms of trajectories (SMwST)(Pan  
439 et al., 2008) in a two-dimensional collective variable space,  $(\Delta D, Z_{P_i})$ . To achieve the  
440 conformational sampling along the refined transition path by the bias exchange

441 umbrella sampling (BEUS)(Moradi et al., 2015; Moradi & Tajkhorshid, 2014; Sugita et  
442 al., 2000) (simulation sets 6 and 12), the so-called path collective variables  
443 (pathCV)(Branduardi et al., 2007) were used:

$$s(\mathbf{z}) = \frac{1}{M-1} \frac{\sum_{i=1}^M (i-1) e^{-\lambda(z-z_i)^2}}{\sum_{i=1}^M e^{-\lambda(z-z_i)^2}} \quad (1)$$

$$\zeta(\mathbf{z}) = -\frac{1}{\lambda} \ln \left( \sum_{i=1}^M e^{-\lambda(z-z_i)^2} \right) \quad (2)$$

444 where  $\lambda$  is the average RMSD between images,  $M$  is the number of images,  $\mathbf{z}$  is a vector  
445 for the current values of the collective variables, and  $z_i$  is the collective variables vector  
446 for the  $i$ -th image. In this paper,  $\mathbf{z}$  was represented as a two-dimensional vector ( $\Delta D$ ,  
447  $Z_{Pi}$ ).

448

## 449 Sampling protocol

450 At first, to generate the  $IF_b^{\text{cent}}$  and  $OF_b^{\text{cent}}$  states from the Occ state crystal  
451 structure, we performed a non-equilibrium pulling simulation (or steered MD  
452 simulation(Izrailev, Stepaniants, Balsera, Oono, & Schulten, 1997)) using the collective  
453 variable  $\Delta D$  (simulation sets 1 and 2). These simulations were performed by moving the  
454 center harmonic restraint with a force constant of  $10 \text{ kcal mol}^{-1} \text{ \AA}^{-2}$  and using the  $\Delta D$   
455 ranges from 0 to  $-10 \text{ \AA}$  and 0 to  $10 \text{ \AA}$ , to generate  $IF_b^{\text{cent}}$  and  $OF_b^{\text{cent}}$ , respectively. The  
456 final structures from simulation sets 1 and 2 were used as the initial structures of the  
457 simulation sets 3 and 4, respectively, in which we induced the conformational  
458 transitions to  $IF_b^{\text{intra}}$  and  $OF_b^{\text{extra}}$  using the collective variable  $Z_{Pi}$  within the ranges from  
459 0 to  $-15 \text{ \AA}$  and 0 to  $15 \text{ \AA}$ , respectively.

460 As the  $IF_b^{\text{intra}} \leftrightarrow OF_b^{\text{extra}}$  transition was expected to undergo complicated

461 conformational changes, including large scale substrate translocation and a significant  
462 local conformational change of the protein, we first refined the  $IF_b^{\text{intra}} \leftrightarrow OF_b^{\text{extra}}$   
463 transition with SMwST, prior to reconstructing the entire conformational transition,  $IF_a$   
464  $\leftrightarrow Occ \leftrightarrow OF_a$ . The final frames of these simulation sets were used to generate the  
465 initial string of the  $IF_b^{\text{intra}} \leftrightarrow OF_b^{\text{extra}}$  transition. We defined the initial  $IF_b^{\text{intra}} \leftrightarrow OF_b^{\text{extra}}$   
466 transition string with 40 images: 10 frames from simulation set 3 ( $Z_{Pi} = 0, -1.5, -3.0, \dots,$   
467  $-15 \text{ \AA}$ ), 10 frames from simulation set 4 ( $Z_{Pi} = 0, 1.5, 3.0, \dots, 15 \text{ \AA}$ ) and 20 frames  
468 from simulation set 2 ( $\Delta D = -10, -9, \dots, 10 \text{ \AA}$ ). This initial string was refined with  
469 SMwST in the two-dimensional ( $\Delta D, Z_{Pi}$ ) collective variable space (simulation set 5).  
470 The selected images were minimized with 10,000 steps, followed by 1 ns of  
471 equilibration in the NPT ensemble with  $\Delta D$  and  $Z_{Pi}$  restraints to the initial values.  
472 Twenty swarms of 0.1 ps unrestrained simulation were followed by 20 ps of restrained  
473 simulation, and the force constants for both  $\Delta D$  and  $Z_{Pi}$  were  $1.0 \text{ kcal mol}^{-1} \text{ \AA}^{-2}$ . The  
474 string was converged after 234 iterations. The last 20 strings were averaged and used as  
475 the  $IF_b^{\text{intra}} \leftrightarrow OF_b^{\text{extra}}$  transition path in simulation set 6. To perform the free energy  
476 calculation with BEUS along the refined transition string, we utilized the path collective  
477 variables (Branduardi et al., 2007) ( $\text{pathCV}(s)$  and  $\text{pathCV}(\zeta)$ ) defined by equations (1)  
478 and (2) with the lambda value of 1.0. The 20 windows for the collective variable  $s =$   
479  $0.025, 0.075, \dots, 0.975$  (increased by 0.05) were used for BEUS with a harmonic force  
480 constant of  $200 \text{ kcal mol}^{-1} \text{ \AA}^{-2}$ . The collective variable  $\zeta$  was restrained to 0.0 with a  
481 harmonic force constant of  $200 \text{ kcal mol}^{-1} \text{ \AA}^{-2}$ . The replica exchange was attempted  
482 between neighboring replicas with an interval of 2.0 ps for each unique pair. The atomic  
483 coordinates were sampled every 2.0 ps.

484 Next, to induce the conformational transition to the *apo* structure, the final

485 frames of simulation sets 1 and 2 were further employed in the non-equilibrium pulling  
486 simulation, using the collective variable  $Z_{P_i}$  (simulation sets 7 and 9) with the ranges  
487 from 0 to  $-45 \text{ \AA}$  and from 0 to  $45 \text{ \AA}$ , respectively. BEUS with 16 windows along  $Z_{P_i}$  for  
488 the transition from  $IF_b^{\text{cent}}$  to  $IF_a$  was performed with window centers (and force  
489 constants) of  $-2.0, -4.5, -6.5, -8.0, -9.0, -10.5, -12.0, -14.0, -15.5, -18.0, -20.5, -22.0,$   
490  $-24.0, -28.0, -33.0$  and  $-40.0 \text{ \AA}$  ( $0.2, 0.5, 1.0, 1.0, 1.0, 0.5, 0.5, 0.5, 0.5, 0.5, 0.5, 0.5, 0.1,$   
491  $0.1, 0.05$  and  $0.01 \text{ kcal mol}^{-1} \text{ \AA}^{-2}$ ) (simulation set 8). BEUS with 16 windows along  $Z_{P_i}$   
492 for the transition from  $OF_b^{\text{cent}}$  to  $OF_a$  was also performed with window centers and force  
493 constants of  $0, 2.5, 4.0, 6.0, 8.5, 10.5, 12.5, 14.0, 16.0, 18.0, 20.0, 22.0, 25.0, 29.0, 33.0$   
494 and  $40 \text{ \AA}$  ( $0.5, 1.0, 1.0, 0.5, 0.5, 0.5, 0.5, 0.5, 0.5, 0.5, 0.5, 0.5, 0.1, 0.1, 0.05$  and  $0.05$   
495  $\text{ kcal mol}^{-1} \text{ \AA}^{-2}$ ) (simulation set 10).

496 The structures and free energy information obtained from simulation sets 6, 8  
497 and 10 were utilized for the PHSM (Moradi et al., 2015) to generate the initial string for  
498 the transition  $IF_a \leftrightarrow OF_a$ . The PHSM was performed as described previously (Moradi et  
499 al., 2015). First, the initial string was generated by a non-parametric version of the  
500 lowest free energy pathway (LFEP) (Ensing, Laio, Parrinello, & Klein, 2005; Moradi et  
501 al., 2015). The following 37 metrics were used for the non-parametric LFEP and PHSM  
502 algorithm: (i)  $Z_{P_i}$ , (ii) first 8  $C\alpha$ -based principal components, (iii)  $D_{\text{in}}$  and  $D_{\text{out}}$ , (iv) four  
503 atomic distances of K128-F192O, K128-V195O, K271-L347O and K271-V350O, (v)  
504 minimum distances ( $D_{\text{min}}$ ) between  $P_i$  and pore-lining polar residues: N124, K128,  
505 H201, K204, R266, K271, Y339, K362 and R363, (vi)  $D_{\text{min}}$  values of internal salt  
506 bridges E207-K204, E207-K362 and E207-R363, and (vii)  $\chi_1$  angles for all 10 residues  
507 listed in (v) and (vi). A distance was defined in this 37-dimensional collective variable  
508 space of (i) to (vii), using a diagonal metric matrix with the values  $1/\text{\AA}^2, 0.04/\text{\AA}^2, 1/\text{\AA}^2,$



509  $1/\text{\AA}^2$ ,  $0.01/\text{\AA}^2$ ,  $1/\text{\AA}^2$  and  $0.0025/(1^\circ)^2$  for the elements in (i) to (vii), respectively. These  
510 weights were roughly chosen based on the relative variance of the collective variables.  
511 The initial string generated by the non-parametric LFEP was used for the PHSM  
512 algorithm with 400 image centers. The tube thickness  $\varepsilon = 0.5$  was used in the PHSM  
513 algorithm, since it gives the smoothest pathway as compared with other results based on  
514  $\varepsilon = 0.1, 0.2, \dots 1.0$ .

515 The string of the  $\text{IF}_a \leftrightarrow \text{OF}_a$  transition generated by the PHSM algorithm was  
516 further refined with SMwST (simulation set 11) in the two-dimensional collective  
517 variable space  $(\Delta D, Z_{\text{Pi}})$ . We selected 40 images from the string refined with the PHSM  
518 algorithm at even intervals. The selected images from PHSM were minimized and  
519 equilibrated in the same manner as the simulation set 5. In this analysis, 20 swarms of 5  
520 ps unrestrained simulation were performed, followed by 10 ps of restrained simulation  
521 with force constants of 10.0 kcal/mol for each collective variable. The string was  
522 converged after 50 iterations. The final 10 strings were averaged, and used for the final  
523 BEUS sampling.

524 The final BEUS sampling along the refined  $\text{IF}_a \leftrightarrow \text{OF}_a$  transition string  
525 (simulation set 12) was performed using the  $\text{pathCV}(s)$  and  $\text{pathCV}(\zeta)$  with  $\lambda = 0.1$   
526 (equations (1), (2)). The 40 images corresponding to the image points of the averaged  
527 string were selected and equilibrated for 0.1 ns with the collective variables  $(\Delta D, Z_{\text{Pi}})$   
528 restrained. In total, 40 windows,  $s = 0.015, 0.035, \dots 0.99$  (increased by 0.025) for the  
529  $\text{pathCV}(s)$  were used for BEUS, with a force constant of  $500 \text{ kcal mol}^{-1}$ . The  $\text{pathCV}(\zeta)$   
530 is restrained to the region  $\zeta < 1.0$  with half-harmonic restraints with a force constant of  
531  $100 \text{ kcal mol}^{-1}$ . The exchange was attempted between the neighboring replicas with an  
532 interval of 10 ps for each unique pair. The sampling was performed for 50 ns, and the

533 coordinates for all atoms were sampled every 2 ps, to obtain 1,000,000 structures (= 40  
534 replicas x 50 ns / 2 ps) in total.

535

## 536 **Data analysis**

537 Data analysis was performed using MDAnalysis(Michaud-Agrawal, Denning,  
538 Woolf, & Beckstein, 2011), mdtraj(McGibbon et al., 2015), and HOLE(Smart et al.,  
539 1996), along with in-house python and C++ codes. All molecular graphics were  
540 illustrated with CueMol2 (<http://www.cuemol.org/>). Plot graphics were generated with  
541 ggplot2(Wickham, 2009), seaborn(Waskom et al., 2016) and matplotlib(Hunter, 2007).

542 To calculate the potential of mean force (PMF) from the BEUS simulations  
543 along the path collective variable  $s$  in Figure 1f, the C implementation of the WHAM  
544 algorithm(Kumar et al., 1992) (Grossfield, Alan, "WHAM: the weighted histogram  
545 analysis method", version 2.0.9 <http://membrane.urmc.rochester.edu/content/wham>) was  
546 used. To perform the *post-hoc* string method analysis, the weights for each structure  $w^t$   
547 were required(Moradi et al., 2015). They were calculated by the following generalized  
548 WHAM equation(Bartels, 2000; Moradi et al., 2015):

$$w^t = \left( \sum_j T_j \exp[-\beta(U_j(\zeta^t) - F_j)] \right)^{-1} \quad (3)$$

$$\exp[-\beta F_i] = \sum_t w^t \exp[-\beta U_i(\zeta^t)] \quad (4)$$

549 where  $\beta = 1/k_B T$  is the inverse temperature,  $T_j$  is the number of samples collected for  
550 image  $j$ ,  $F_j$  is the PMF for the  $j$ -th umbrella window,  $\zeta^t$  is the collective variable at  
551 time  $t$ , and  $U_j(x) = 1/2 k_j (x - x_j^{center})^2$  is the  $j$ -th umbrella potential used in the

552 BEUS simulation. The projection of the PMF from one collective variable space to  
553 another one,  $\xi$ , was performed with the following equation(Moradi et al., 2015):

$$G(\xi) = -\frac{1}{\beta} \ln \left( \sum_t w^t K(\xi(x^t) - \xi) \right) \quad (5)$$

554 where  $K(\cdot)$  is a kernel function. In this study, the RBF kernel was used.

555 The principal component analysis (PCA) was performed on the C $\alpha$  atoms of  
556 GsGPT. The coordinates of the trajectory were superimposed on the averaged structure  
557 of simulation set 12. The covariance matrix of the atomic fluctuations was calculated,  
558 and its eigenvalues and eigenvectors were determined. The calculation of the number of  
559 hydrogen bonds in Figure 3 was performed by the following equation:

$$\sum_{i \in \text{group}} \frac{1 - \left( d_i / d_0 \right)^n}{1 - \left( d_i / d_0 \right)^m} \quad (6)$$

560 where  $d_i$  is the distance between two hydrogen-bonding atoms,  $d_0$  is a cutoff distance,  
561 and  $n$  and  $m$  are integers that determine the behavior of the switching function. The sum  
562 is taken over all of the hydrogen bonding atom pairs. In this study,  $d_0 = 3.3 \text{ \AA}$ ,  $n = 6$  and  
563  $m = 8$  were used.

564

## 565 **Transport assay**

566 The liposome assays were performed as previously described(Lee et al., 2017).  
567 In brief, the liposomes reconstituted with yeast membranes expressing WT or mutant  
568 GsGPT were preloaded with 30 mM NaH<sub>2</sub>PO<sub>4</sub>, and were mixed with an equal volume of  
569 extra-liposomal solution containing 1 mM [<sup>32</sup>P]-NaH<sub>2</sub>PO<sub>4</sub> (0.1 mCi ml<sup>-1</sup>). The reaction

570 was terminated by passing the liposomes through AG-1 X8 resin. The total amounts of  
571 incorporated  $P_i$  were measured at 30 min. The control experiment was performed with  
572 membranes from yeast cells harboring the empty vector. The mean count value of the  
573 control experiment was subtracted from each count value for each experiment set, and  
574 the values shown in the figures were normalized with the mean value of the WT. The  
575 expression of each mutant was verified by a western-blot analysis, using an anti-His-tag  
576 polyclonal antibody (code PM032; MBL).

577

578

## 579 References

- 580 Bartels, C. (2000). Analyzing biased Monte Carlo and molecular dynamics simulations.  
581 *Chemical Physics Letters*, 331(5–6), 446–454.  
582 [http://doi.org/10.1016/S0009-2614\(00\)01215-X](http://doi.org/10.1016/S0009-2614(00)01215-X)
- 583 Best, R. B., Zhu, X., Shim, J., Lopes, P. E. M., Mittal, J., Feig, M., & MacKerell, A. D.  
584 (2012). Optimization of the additive CHARMM all-atom protein force field  
585 targeting improved sampling of the backbone  $\phi$ ,  $\psi$  and side-chain  $\chi$  1 and  $\chi$  2  
586 Dihedral Angles. *Journal of Chemical Theory and Computation*, 8(9), 3257–3273.  
587 <http://doi.org/10.1021/ct300400x>
- 588 Branduardi, D., Gervasio, F. L., & Parrinello, M. (2007). From A to B in free energy  
589 space. *The Journal of Chemical Physics*, 126(5), 54103.  
590 <http://doi.org/10.1063/1.2432340>
- 591 Brooks, C. F., Johnsen, H., van Dooren, G. G., Muthalagi, M., Lin, S. S., Bohne, W., ...  
592 Striepen, B. (2010). The Toxoplasma Apicoplast Phosphate Translocator Links  
593 Cytosolic and Apicoplast Metabolism and Is Essential for Parasite Survival. *Cell*  
594 *Host and Microbe*, 7(1), 62–73. <http://doi.org/10.1016/j.chom.2009.12.002>
- 595 Chen, Y.-J., Pornillos, O., Lieu, S., Ma, C., Chen, A. P., & Chang, G. (2007). X-ray  
596 structure of EmrE supports dual topology model. *Proceedings of the National*  
597 *Academy of Sciences*, 104(48), 18999–19004.  
598 <http://doi.org/10.1073/pnas.0709387104>
- 599 Darden, T., York, D., & Pedersen, L. (1993). Particle mesh Ewald: An N log(N) method  
600 for Ewald sums in large systems. *The Journal of Chemical Physics*, 98(12), 10089.  
601 <http://doi.org/10.1063/1.464397>
- 602 Drew, D., & Boudker, O. (2016). Shared Molecular Mechanisms of Membrane  
603 Transporters. *Annual Review of Biochemistry*, 85, 543–72.  
604 <http://doi.org/10.1146/annurev-biochem-060815-014520>
- 605 Eicks, M., Maurino, V., Knappe, S., Flügge, U.-I., & Fischer, K. (2002). The plastidic  
606 pentose phosphate translocator represents a link between the cytosolic and the  
607 plastidic pentose phosphate pathways in plants. *Plant Physiology*, 128(2), 512–22.  
608 <http://doi.org/10.1104/pp.010576>
- 609 Ensing, B., Laio, A., Parrinello, M., & Klein, M. L. (2005). A recipe for the computation  
610 of the free energy barrier and the lowest free energy path of concerted reactions.  
611 *Journal of Physical Chemistry B*, 109(14), 6676–6687.  
612 <http://doi.org/10.1021/jp045571i>
- 613 Feller, S. E., Zhang, Y., Pastor, R. W., & Brooks, B. R. (1995). Constant pressure

- 614 molecular dynamics simulation: The Langevin piston method. *The Journal of*  
615 *Chemical Physics*, 103(11), 4613. <http://doi.org/10.1063/1.470648>
- 616 Fiorin, G., Klein, M. L., & Hémin, J. (2013). Using collective variables to drive molecular  
617 dynamics simulations. *Molecular Physics*, 111(22–23), 3345–3362.  
618 <http://doi.org/10.1080/00268976.2013.813594>
- 619 Fischer, K., Kammerer, B., Gutensohn, M., Arbinger, B., Weber, A., Häusler, R. E., &  
620 Flügge, U. I. (1997). A new class of plastidic phosphate translocators: a putative link  
621 between primary and secondary metabolism by the phosphoenolpyruvate/phosphate  
622 antiporter. *The Plant Cell*, 9(3), 453–62. <http://doi.org/10.1105/tpc.9.3.453>
- 623 Fliege, R., Flügge, U. I., Werdan, K., & Heldt, H. W. (1978). Specific transport of  
624 inorganic phosphate, 3-phosphoglycerate and triosephosphates across the inner  
625 membrane of the envelope in spinach chloroplasts. *BBA - Bioenergetics*, 502(2),  
626 232–247. [http://doi.org/10.1016/0005-2728\(78\)90045-2](http://doi.org/10.1016/0005-2728(78)90045-2)
- 627 Flügge, U.-I., Weber, A., Fischer, K., Lottspeich, F., Eckerskorn, C., Waegemann, K., &  
628 Soll, J. (1991). The major chloroplast envelope polypeptide is the phosphate  
629 translocator and not the protein import receptor. *Nature*, 353(6342), 364–367.  
630 <http://doi.org/10.1038/353364a0>
- 631 Flügge, U. I. I., Fischer, K., Gross, A., Sebald, W., Lottspeich, F., & Eckerskorn, C.  
632 (1989). The triose phosphate-3-phosphoglycerate-phosphate translocator from  
633 spinach chloroplasts: nucleotide sequence of a full-length cDNA clone and import of  
634 the in vitro synthesized precursor protein into chloroplasts. *The EMBO Journal*, 8(1),  
635 39–46. Retrieved from <http://www.ncbi.nlm.nih.gov/pubmed/2714257>
- 636 Hattenbach, A., Muller-Rober, B., Nast, G., & Heineke, D. (1997). Antisense Repression  
637 of Both ADP-Glucose Pyrophosphorylase and Triose Phosphate Translocator  
638 Modifies Carbohydrate Partitioning in Potato Leaves. *Plant Physiology*, 115(2),  
639 471–475. <http://doi.org/10.1104/pp.115.2.471>
- 640 Häusler, R. E., Schlieben, N. H., & Flügge, U. I. (2000). Control of carbon partitioning  
641 and photosynthesis by the triose phosphate/phosphate translocator in transgenic  
642 tobacco plants (*Nicotiana tabacum*). II. Assessment of control coefficients of the  
643 triose phosphate/phosphate translocator. *Planta*, 210(3), 383–90.  
644 <http://doi.org/10.1007/PL00008146>
- 645 Häusler, R. E., Schlieben, N. H., Nicolay, P., Fischer, K. L., Fischer, K. L., & Flügge, U.  
646 I. (2000). Control of carbon partitioning and photosynthesis by the triose  
647 phosphate/phosphate translocator in transgenic tobacco plants (*Nicotiana tabacum*  
648 L.). I. Comparative physiological analysis of tobacco plants with antisense  
649 repression and overexpression of t. *Planta*, 210(3), 371–82.

- 650 <http://doi.org/10.1007/PL00008145>
- 651 Heineke, D., Kruse, A., Flügge, U.-I. I., Frommer, W. B., Riesmeier, J. W., Willmitzer, L.,  
652 & Heldt, H. W. (1994). Effect of antisense repression of the chloroplast  
653 triose-phosphate translocator on photosynthetic metabolism in transgenic potato  
654 plants. *Planta*, 193(2), 174–180. <http://doi.org/10.1007/BF00192527>
- 655 Henzler-Wildman, K. (2012). Analyzing conformational changes in the transport cycle of  
656 EmrE. *Current Opinion in Structural Biology*, 22(1), 38–43.  
657 <http://doi.org/10.1016/j.sbi.2011.10.004>
- 658 Huang, Y., Lemieux, M. J., Song, J., Auer, M., & Wang, D.-N. (2003). Structure and  
659 mechanism of the glycerol-3-phosphate transporter from Escherichia coli. *Science*  
660 (New York, N.Y.), 301(5633), 616–20. <http://doi.org/10.1126/science.1087619>
- 661 Humphrey, W., Dalke, A., & Schulten, K. (1996). VMD: Visual molecular dynamics.  
662 *Journal of Molecular Graphics*, 14(1), 33–38.  
663 [http://doi.org/10.1016/0263-7855\(96\)00018-5](http://doi.org/10.1016/0263-7855(96)00018-5)
- 664 Hunter, J. D. (2007). Matplotlib: A 2D Graphics Environment. *Computing in Science &*  
665 *Engineering*, 9(3), 90–95. <http://doi.org/10.1109/MCSE.2007.55>
- 666 Izrailev, S., Stepaniants, S., Balsera, M., Oono, Y., & Schulten, K. (1997). Molecular  
667 dynamics study of unbinding of the avidin-biotin complex. *Biophysical Journal*,  
668 72(4), 1568–1581. [http://doi.org/10.1016/S0006-3495\(97\)78804-0](http://doi.org/10.1016/S0006-3495(97)78804-0)
- 669 Jack, D. L., Yang, N. M., & H. Saier, M. (2001). The drug/metabolite transporter  
670 superfamily. *European Journal of Biochemistry*, 268(13), 3620–3639.  
671 <http://doi.org/10.1046/j.1432-1327.2001.02265.x>
- 672 Jardetzky, O. (1966). Simple allosteric model for membrane pumps. *Nature*, 211(5052),  
673 969–970. <http://doi.org/10.1038/211969a0>
- 674 Kammerer, B., Fischer, K., Hilpert, B., Schubert, S., Gutensohn, M., Weber, A., &  
675 Flügge, U. I. (1998). Molecular characterization of a carbon transporter in plastids  
676 from heterotrophic tissues: the glucose 6-phosphate/phosphate antiporter. *The Plant*  
677 *Cell*, 10(1), 105–17. <http://doi.org/10.2307/3870632>
- 678 Khalili-Araghi, F., Gumbart, J., Wen, P. C., Sotomayor, M., Tajkhorshid, E., & Schulten,  
679 K. (2009). Molecular dynamics simulations of membrane channels and transporters.  
680 *Current Opinion in Structural Biology*, 19(2), 128–137.  
681 <http://doi.org/10.1016/j.sbi.2009.02.011>
- 682 Klauda, J. B., Venable, R. M., Freites, J. A., O'Connor, J. W., Tobias, D. J.,  
683 Mondragon-Ramirez, C., ... Pastor, R. W. (2010). Update of the CHARMM  
684 All-Atom Additive Force Field for Lipids: Validation on Six Lipid Types. *The*  
685 *Journal of Physical Chemistry B*, 114(23), 7830–7843.

- 686 <http://doi.org/10.1021/jp101759q>
- 687 Knappe, S., Flügge, U.-I., & Fischer, K. (2003). Analysis of the plastidic phosphate  
688 translocator gene family in Arabidopsis and identification of new phosphate  
689 translocator-homologous transporters, classified by their putative substrate-binding  
690 site. *Plant Physiology*, *131*(3), 1178–1190. <http://doi.org/10.1104/pp.016519>
- 691 Kumar, S., Rosenberg, J. M., Bouzida, D., Swendsen, R. H., & Kollman, P. A. (1992).  
692 THE weighted histogram analysis method for free-energy calculations on  
693 biomolecules. I. The method. *Journal of Computational Chemistry*, *13*(8), 1011–  
694 1021. <http://doi.org/10.1002/jcc.540130812>
- 695 Law, C. J., Almqvist, J., Bernstein, A., Goetz, R. M., Huang, Y., Soudant, C., ... Wang, D.  
696 N. (2008). Salt-bridge Dynamics Control Substrate-induced Conformational  
697 Change in the Membrane Transporter GlpT. *Journal of Molecular Biology*, *378*(4),  
698 826–837. <http://doi.org/10.1016/j.jmb.2008.03.029>
- 699 Law, C. J., Maloney, P. C., & Wang, D.-N. (2008). Ins and Outs of Major Facilitator  
700 Superfamily Antiporters. *Annual Review of Microbiology*, *62*(1), 289–305.  
701 <http://doi.org/10.1146/annurev.micro.61.080706.093329>
- 702 Lee, Y., Nishizawa, T., Takemoto, M., Kumazaki, K., Yamashita, K., Hirata, K., ...  
703 Nureki, O. (2017). Structure of the triose-phosphate/phosphate translocator reveals  
704 the basis of substrate specificity. *Nature Plants*.  
705 <http://doi.org/10.1038/s41477-017-0022-8>
- 706 Linka, M., Jamai, A., & Weber, A. P. M. (2008). Functional characterization of the  
707 plastidic phosphate translocator gene family from the thermo-acidophilic red alga  
708 *Galdieria sulphuraria* reveals specific adaptations of primary carbon partitioning in  
709 green plants and red algae. *Plant Physiology*, *148*(3), 1487–96.  
710 <http://doi.org/10.1104/pp.108.129478>
- 711 McGibbon, R. T., Beauchamp, K. A., Harrigan, M. P., Klein, C., Swails, J. M.,  
712 Hernández, C. X., ... Pande, V. S. (2015). MDTraj: A Modern Open Library for the  
713 Analysis of Molecular Dynamics Trajectories. *Biophysical Journal*, *109*(8), 1528–  
714 1532. <http://doi.org/10.1016/j.bpj.2015.08.015>
- 715 Michaud-Agrawal, N., Denning, E. J., Woolf, T. B., & Beckstein, O. (2011).  
716 MDAnalysis: a toolkit for the analysis of molecular dynamics simulations. *Journal*  
717 *of Computational Chemistry*, *32*(10), 2319–27. <http://doi.org/10.1002/jcc.21787>
- 718 Moradi, M., Enkavi, G., & Tajkhorshid, E. (2015). Atomic-level characterization of  
719 transport cycle thermodynamics in the glycerol-3-phosphate:phosphate antiporter.  
720 *Nature Communications*, *6*, 8393. <http://doi.org/10.1038/ncomms9393>
- 721 Moradi, M., & Tajkhorshid, E. (2014). Computational Recipe for Efficient Description of



- 722 Large-Scale Conformational Changes in Biomolecular Systems. *Journal of*  
723 *Chemical Theory and Computation*, 10(7), 2866–2880.  
724 <http://doi.org/10.1021/ct5002285>
- 725 Pan, A. C., Sezer, D., & Roux, B. (2008). Finding transition pathways using the string  
726 method with swarms of trajectories. *Journal of Physical Chemistry B*, 112(11),  
727 3432–3440. <http://doi.org/10.1021/jp0777059>
- 728 Phillips, J. C., Braun, R., Wang, W., Gumbart, J., Tajkhorshid, E., Villa, E., ... Schulten,  
729 K. (2005). Scalable molecular dynamics with NAMD. *Journal of Computational*  
730 *Chemistry*, 26(16), 1781–802. <http://doi.org/10.1002/jcc.20289>
- 731 Quistgaard, E. M., Löw, C., Guettou, F., & Nordlund, P. (2016). Understanding transport  
732 by the major facilitator superfamily (MFS): structures pave the way. *Nature*  
733 *Publishing Group*, 1–10. <http://doi.org/10.1038/nrm.2015.25>
- 734 Riesmeier, J. W., Flügge, U. I., Schulz, B., Heineke, D., Heldt, H. W., Willmitzer, L., &  
735 Frommer, W. B. (1993). Antisense repression of the chloroplast triose phosphate  
736 translocator affects carbon partitioning in transgenic potato plants. *Proceedings of*  
737 *the National Academy of Sciences of the United States of America*, 90(13), 6160–4.  
738 <http://doi.org/10.1073/pnas.90.13.6160>
- 739 Schneider, A., Häusler, R. E., Kolukisaoglu, U., Kunze, R., van der Graaff, E., Schwacke,  
740 R., ... Flügge, U.-I. (2002). An *Arabidopsis thaliana* knock-out mutant of the  
741 chloroplast triose phosphate/phosphate translocator is severely compromised only  
742 when starch synthesis, but not starch mobilisation is abolished. *The Plant Journal :*  
743 *For Cell and Molecular Biology*, 32(5), 685–99.  
744 <http://doi.org/10.1046/j.1365-313X.2002.01460.x>
- 745 Shaikh, S. a, Li, J., Enkavi, G., Wen, P.-C., Huang, Z., & Tajkhorshid, E. (2013).  
746 Visualizing functional motions of membrane transporters with molecular dynamics  
747 simulations. *Biochemistry*, 52(4), 569–87. <http://doi.org/10.1021/bi301086x>
- 748 Smart, O. S., Neduvilil, J. G., Wang, X., Wallace, B. A., & Sansom, M. S. P. (1996).  
749 HOLE: A program for the analysis of the pore dimensions of ion channel structural  
750 models. *Journal of Molecular Graphics*, 14(6), 354–360.  
751 [http://doi.org/10.1016/S0263-7855\(97\)00009-X](http://doi.org/10.1016/S0263-7855(97)00009-X)
- 752 Sugita, Y., Kitao, A., & Okamoto, Y. (2000). Multidimensional replica-exchange method  
753 for free-energy calculations. *The Journal of Chemical Physics*, 113(15), 6042.  
754 <http://doi.org/10.1063/1.1308516>
- 755 Torrie, G. M. M., & Valleau, J. P. P. (1977). Nonphysical sampling distributions in  
756 Monte Carlo free-energy estimation: Umbrella sampling. *Journal of Computational*  
757 *Physics*, 23(2), 187–199. [http://doi.org/10.1016/0021-9991\(77\)90121-8](http://doi.org/10.1016/0021-9991(77)90121-8)

- 758 Tsuchiya, H., Doki, S., Takemoto, M., Ikuta, T., Higuchi, T., Fukui, K., ... Nureki, O.  
759 (2016). Structural basis for amino acid export by DMT superfamily transporter  
760 YddG. *Nature*, 534(7607), 417–420. <http://doi.org/10.1038/nature17991>  
761 Waskom, M., Botvinnik, O., drewokane, Hobson, P., David, Halchenko, Y., ... Lee, A.  
762 (2016). seaborn: v0.7.1 (June 2016). <http://doi.org/10.5281/zenodo.54844>  
763 Weber, A. P. M., & Linka, N. (2011). Connecting the plastid: transporters of the plastid  
764 envelope and their role in linking plastidial with cytosolic metabolism. *Annual*  
765 *Review of Plant Biology*, 62, 53–77.  
766 <http://doi.org/10.1146/annurev-arplant-042110-103903>  
767 Weber, A. P. M., Schwacke, R., & Flügge, U.-I. (2005). Solute Transporters of the Plastid  
768 Envelope Membrane. *Annual Review of Plant Biology*, 56(1), 133–164.  
769 <http://doi.org/10.1146/annurev.arplant.56.032604.144228>  
770 Wickham, H. (2009). *ggplot2: Elegant Graphics for Data Analysis*. Springer-Verlag  
771 New York.  
772

## 773 **Acknowledgements**

774 We thank R. Taniguchi and H. Miyauchi (University of Tokyo, Japan) for  
775 comments on the manuscript, and T. Nakane (University of Tokyo, Japan) for technical  
776 assistance. The *post-hoc* string method program was kindly provided by Dr. Mahmoud  
777 Moradi (University of Arkansas). Computations of MD simulations were partially  
778 performed on HOKUSAI GreatWave at the RIKEN Advanced Center for Computing  
779 and Communication, the mini-K super computer system at the SACLA facility, and the  
780 NIG supercomputer at ROIS National Institute of Genetics. This work was supported by  
781 a Grant-in-Aid for Specially Promoted Research (16H06294) and a Grant-in-Aid for  
782 Scientific Research (B) (25291011) from the Japan Society for the Promotion of  
783 Science (JSPS) to O.N. and R.I., respectively.

784

## 785 **Author contributions**

786 M.T. designed the research, performed the molecular dynamics simulation, and  
787 analyzed the data. Y.L. performed the liposome transport assay. M.T., R.I. and O.N.  
788 wrote the manuscript. R.I. and O.N. directed and supervised all of the research.

789

## 790 **Competing financial interests**

791 The authors declare no competing financial interests.

792

793

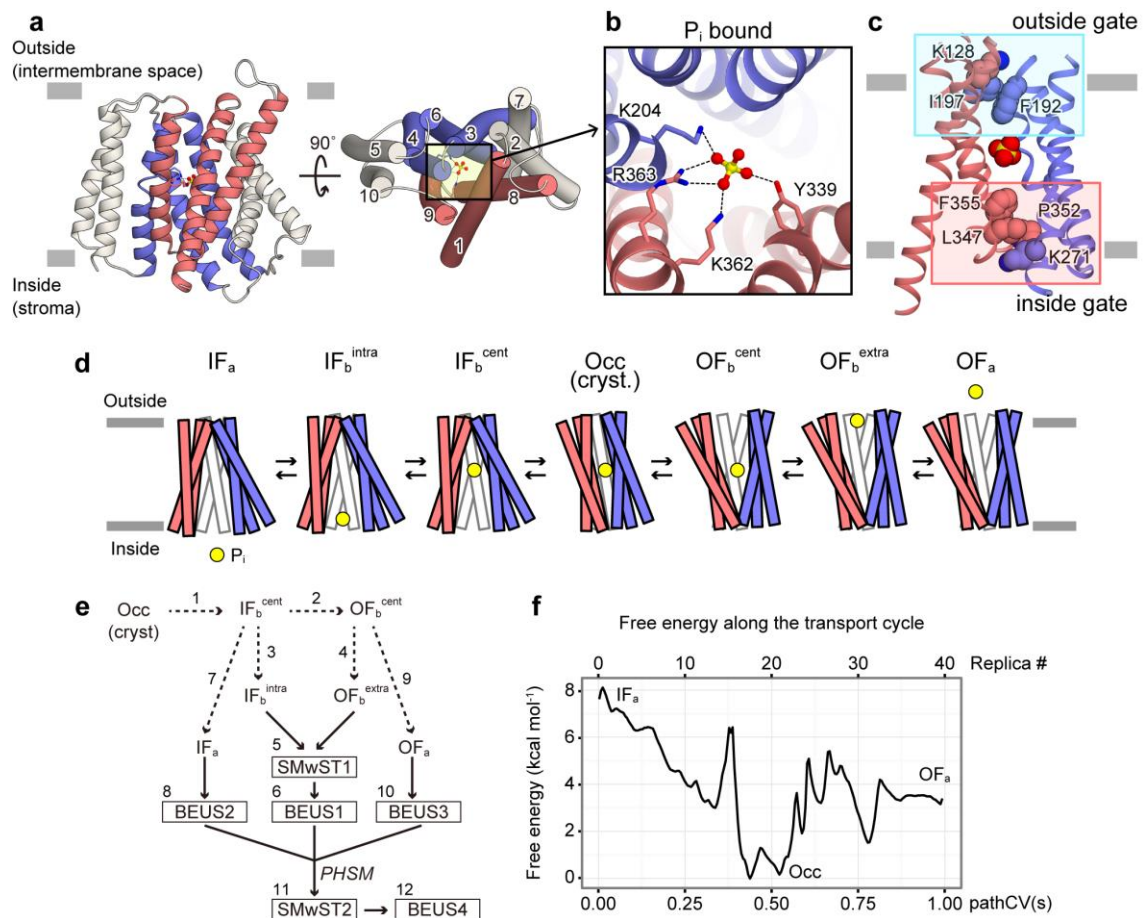

## 794 Figures

### 795 Figure 1 | The crystal structure of GsGPT and simulation overview

796 (a) The crystal structure of GsGPT in the  $P_i$ -bound state (PDB ID: 5Y78),  
 797 viewed from the plane of the membrane (left) and from the intermembrane space (right).  
 798 The numbers in the right panel represent the numbering of the TM helices. Hereafter,  
 799 TM1, 8 and 9 are colored red, TM3, 4 and 6 are colored blue, and the others are colored  
 800 white. (b) Close-up view of the central binding site in the  $P_i$ -bound state. Key residues  
 801 involved in substrate binding are shown in stick models. Dotted lines represent polar  
 802 interactions. (c) Inside and outside gates of GsGPT. The inside and outside gates are

803 highlighted within magenta and cyan rectangles, respectively. The substrate and  
804 gate-forming residues are shown in CPK models. TM2, 5, 7 and 10 are not shown. (d)  
805 Schematic representation of states,  $IF_a$  (*IF-apo*),  $IF_b^{intra}$  (IF-bound at intracellular gate),  
806  $IF_b^{cent}$  (IF-bound at central binding site), Occ,  $OF_b^{cent}$  (OF-bound at central binding site),  
807  $OF_b^{extra}$  (OF-bound at extracellular gate) and  $IF_a$  (*OF-apo*), involved in the currently  
808 studied transport cycle.  $P_i$  is represented by the yellow circle. The TM segments are  
809 colored in the same manner as in panel a. TM2 and 7 are not shown. (e) Graphical  
810 representation of the iterative scheme used for designing the simulations shown in Table  
811 1. The number corresponds to the simulation numbering in Table 1. (f) Free energy  
812 profile along the simulated transport cycle shown in c, based on the final simulation  
813 (simulation set 12).  $pathCV(s)$  represents path collective variable  $s$  (equation (1)).  
814

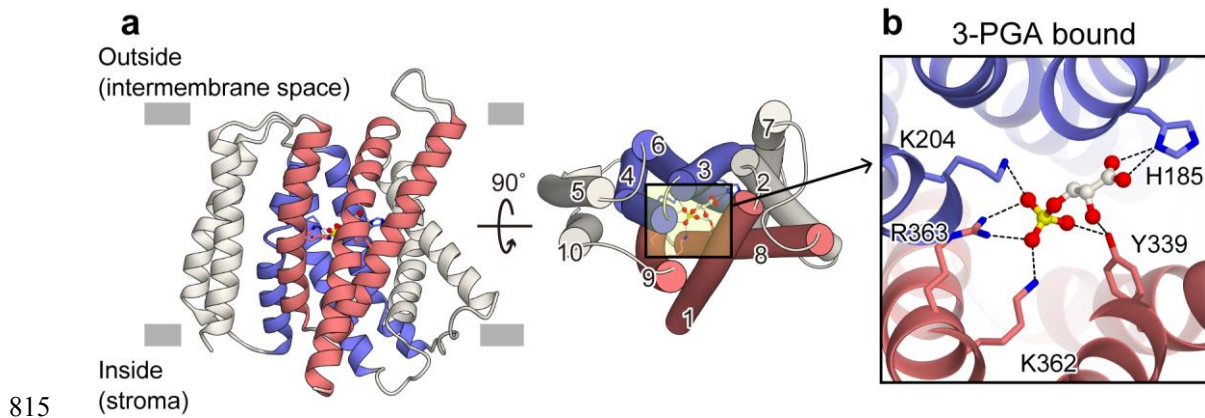

815

816 **Figure 1—figure supplement 1 | Crystal structure of GsGPT with 3-PGA**

817 (a) The crystal structure of GsGPT in the 3-phosphoglyceric acid  
818 (3-PGA)-bound state (PDB ID: 5Y79), viewed from the plane of the membrane (left)  
819 and from the intermembrane space (right). The numbers in the right panel represent the  
820 numbering of the TM helices. TM1, 8 and 9 are colored red, TM3, 4 and 6 are colored  
821 blue, and the others are colored white. (b) Close-up view of the central binding site in  
822 the 3-PGA-bound state. Key residues involved in substrate binding are shown in stick  
823 models. Dotted lines represent polar interactions.

824

825

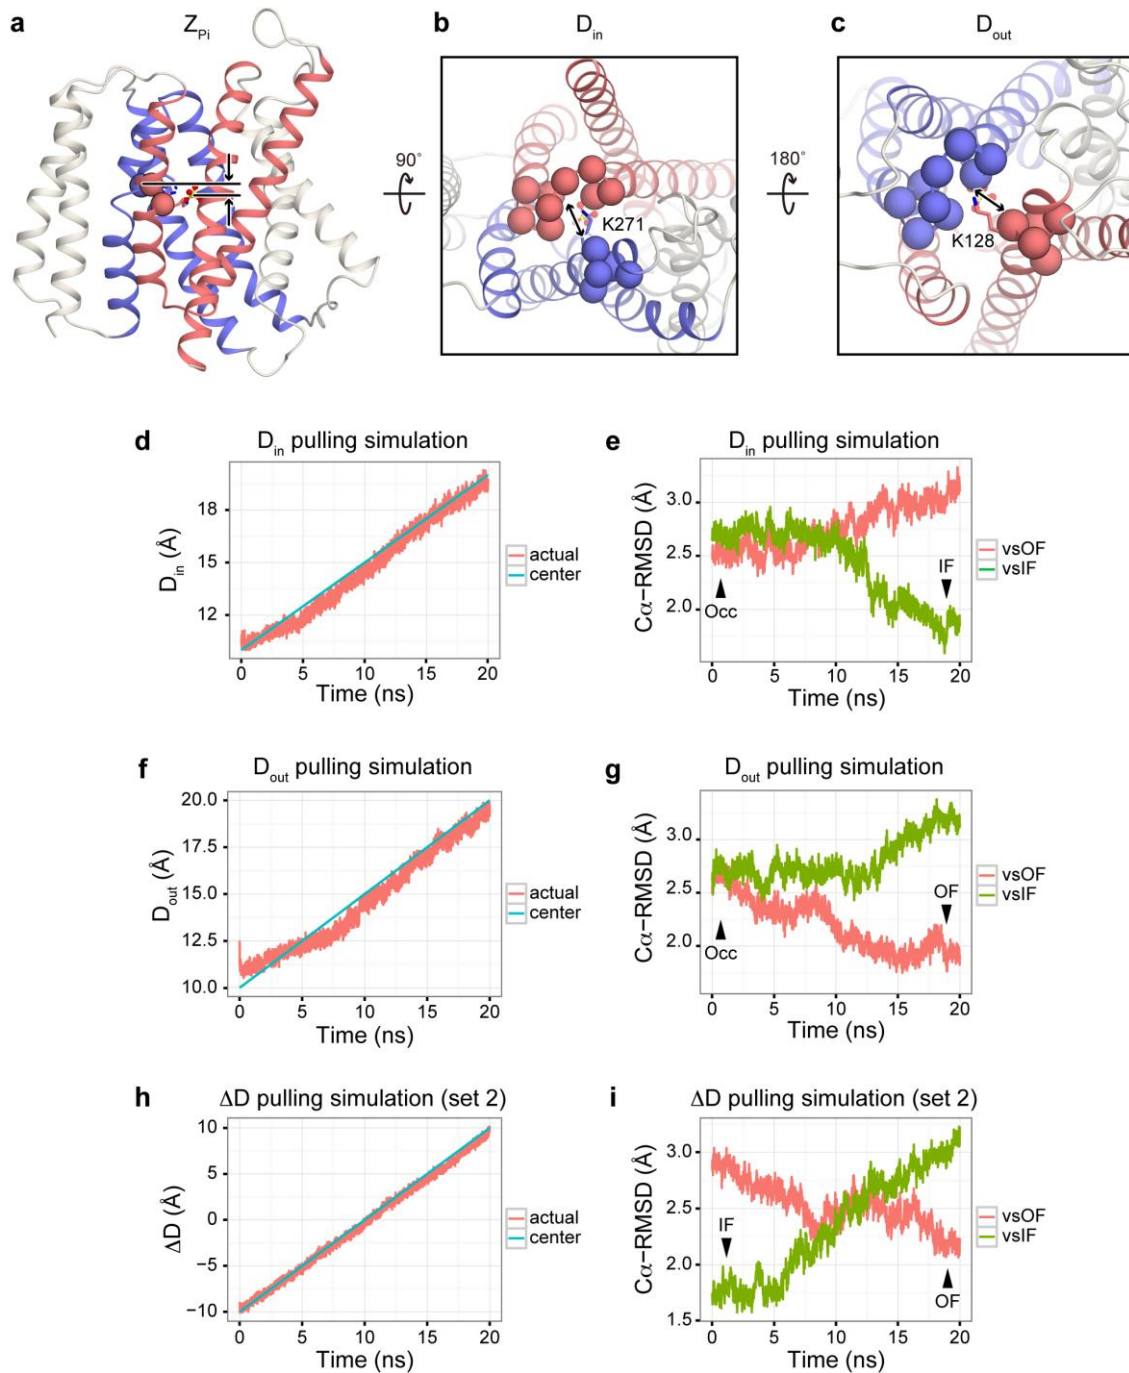

826

827 **Figure 1—figure supplement 2 | The definitions of collective variables and**

828 **the steered MD simulations**

829 (a-c) Definitions of collective variables. (a) Definition of  $Z_{P_i}$ .  $P_i$  is shown with a

830 ball and stick model, and the  $C\alpha$  atoms of Lys204, Lys362 and Arg363 used for the

831 reference points are shown with spheres. (b, c) Definitions of  $D_{in}$  and  $D_{out}$ . The  $C\alpha$   
832 atoms used for the calculation are shown as spheres. (d, f, h) Time courses of the  
833 collective variables, (d)  $D_{in}$ , (f)  $D_{out}$  and (h)  $\Delta D$ , for the non-equilibrium pulling (steered  
834 MD) simulation of each variable. The blue line represents the center of the harmonic  
835 potential, and the red line represents the actual value of the collective variable. (e, g, i)  
836 Time courses of the root-mean-square deviation (RMSD) values of all  $C\alpha$  atoms relative  
837 to the OF (red) and IF (green) conformations. IF, Occ and OF represent the initial,  
838 occluded and final conformations of the protein, respectively.

839

840



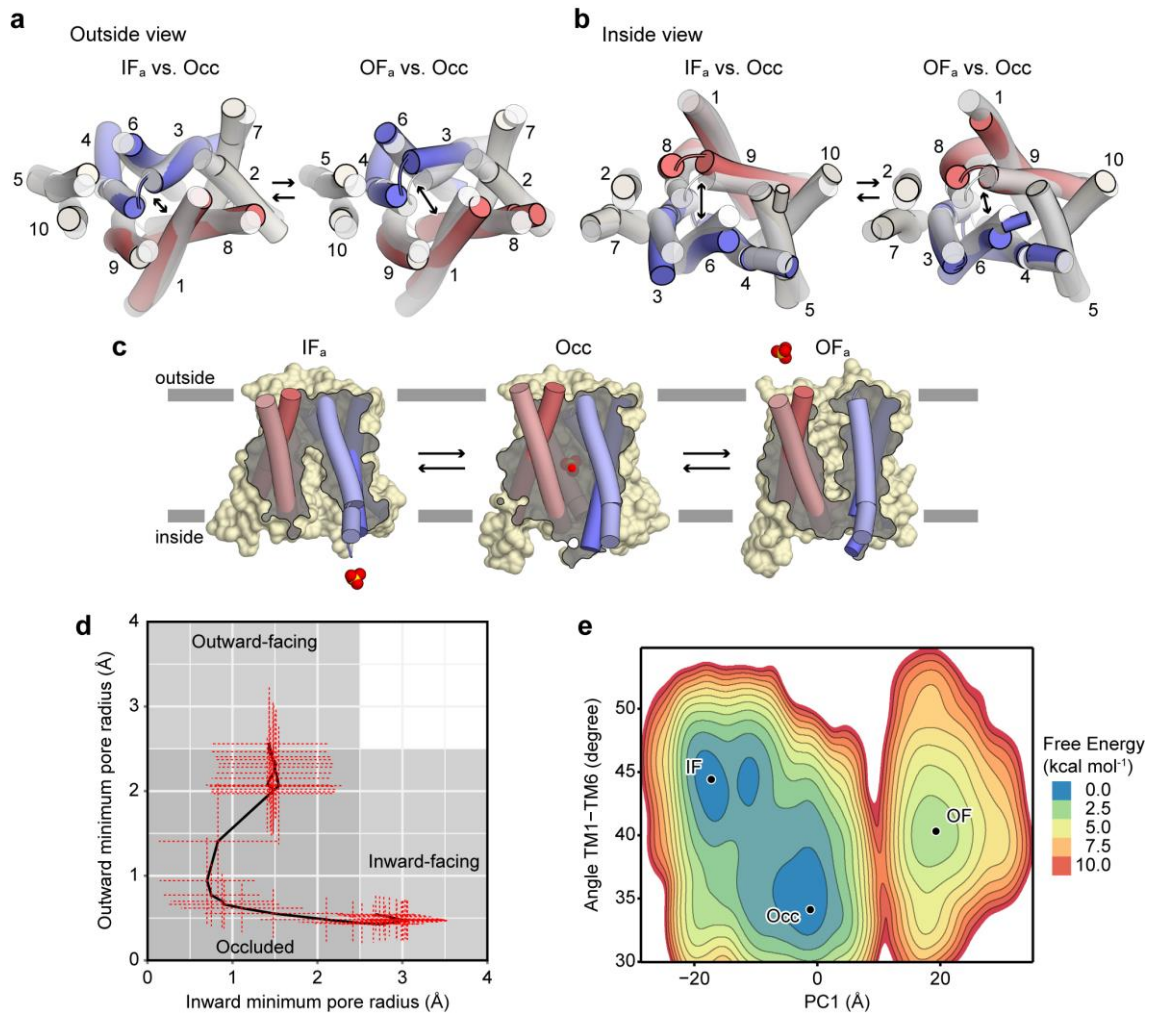

841

## 842 **Figure 2 | Overall conformational change**

843 (a) Outside and (b) inside views of representative structures in the OF and IF  
844 states, shown in cylinder representations. Each structure was superimposed onto the Occ  
845 state structure, shown with a transparent cylinder. Bundle1 and bundle2 are colored red  
846 and blue, respectively, and the other helices are colored white. The number represents  
847 the numbering of the TM helices. (c) Cross-sections of surface representations for the  
848 representative structures from the IF, Occ and OF states. P<sub>i</sub> is shown in a CPK model.  
849 (d) Pore radii at the outside and inside gates. The mean values of the outside and inside  
850 radii in each replica were plotted. The error bars represent the standard deviation in each

851 replica. (e) Free energy landscape in terms of (PC1, TM1-TM6 angle) space. PC1  
852 represents the first principal component of all C $\alpha$  atoms, and the inter-helical angle  
853 between TM1 and TM6 was calculated using the roll axis of the helix (obtained from  
854 the principal axis component analysis for all C $\alpha$  atoms).

855

856

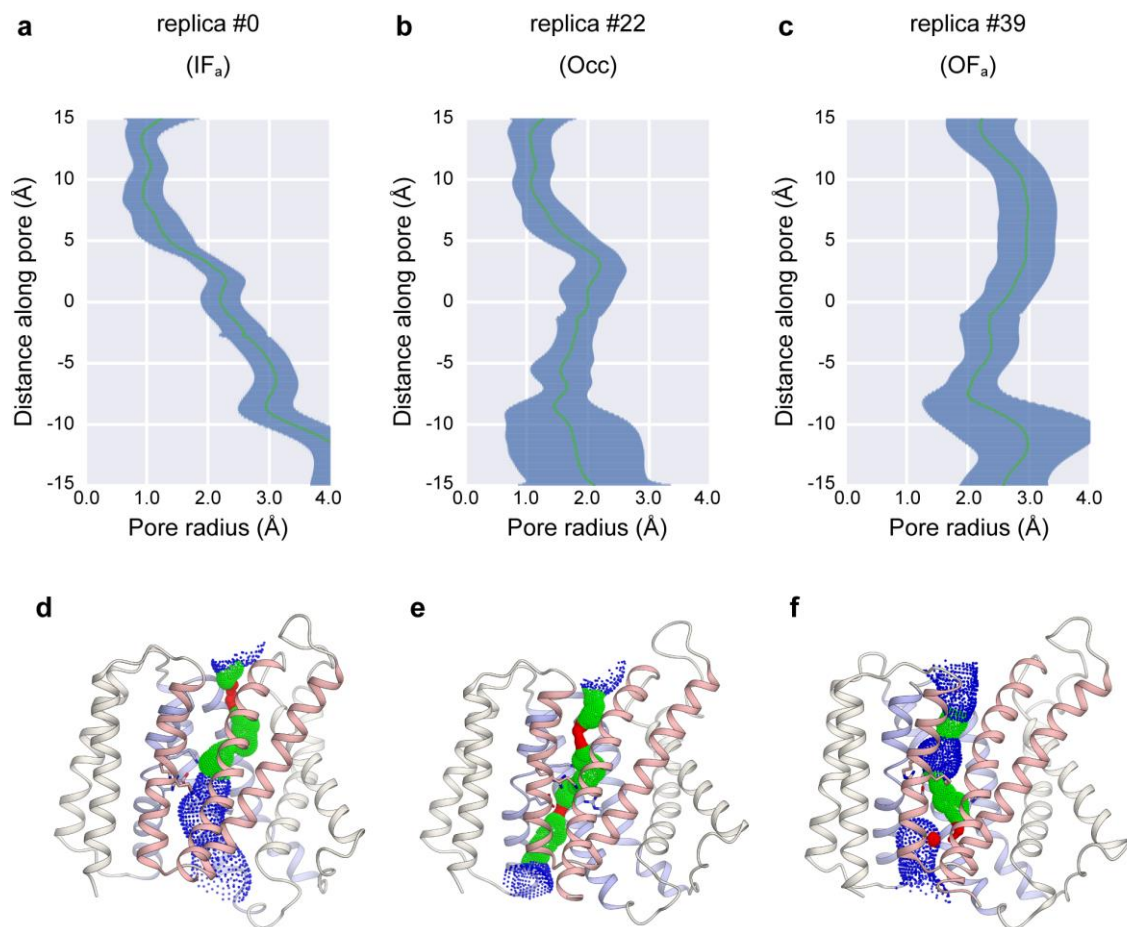

857

858 **Figure 2—figure supplement 1 | Representative results for pore radius**

859 **calculation by HOLE**

860 (a-c) Minimum radius along the path through the central binding site for (a)

861 replica#0 (IF), (b) replica#22 (Occ) and (c) replica#39 (OF). The green line represents

862 the mean value and the blue line represents the mean value and standard deviation for

863 each distance along the pore. (d-f) Representative structures of the (d) IF, (e) Occ and (f)

864 OF states. The red region represents  $r < 0.6$  Å, the green region represents  $0.6 < r < 1.2$

865 Å and the blue region represents  $r > 1.2$  Å.

866

867

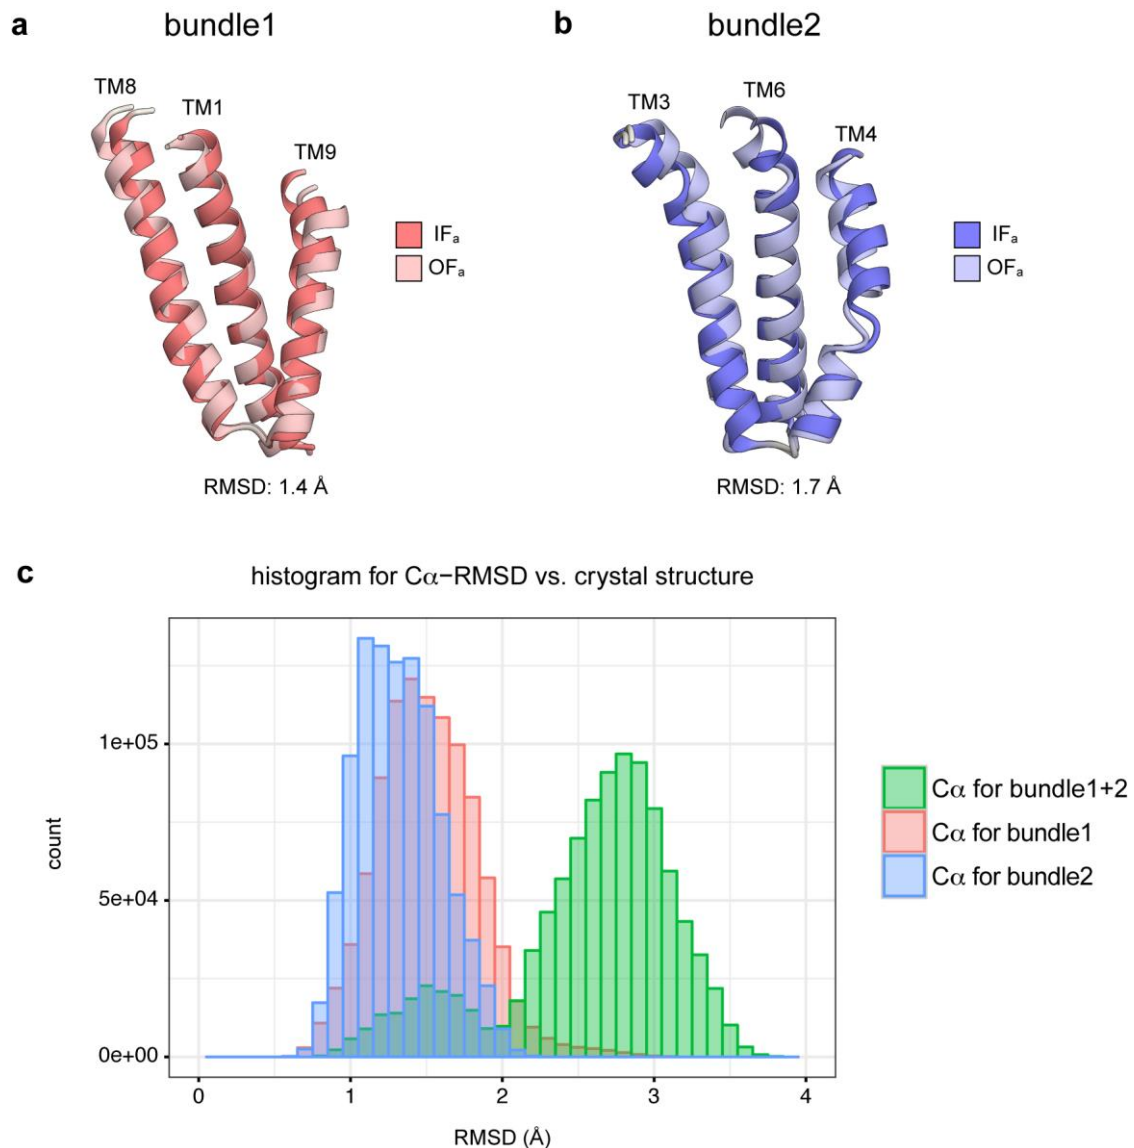

868

869 **Figure 2—figure supplement 2 I Intra-domain movement of the core**

870 **domain**

871 (a, b) Representative conformations of (a) bundle1 and (b) bundle2 from the IF

872 and OF conformations. The root-mean-square deviation (RMSD) values of the C<sub>α</sub>

873 atoms for each structure are shown below. (c) The histogram of RMSD values of C<sub>α</sub>

874 atoms in bundles1+2 (green), bundle1 only (red) and bundle2 only (blue) values relative

875 to the crystal structure. The RMSD values were calculated for the α-helix region of each

876 bundle.

877

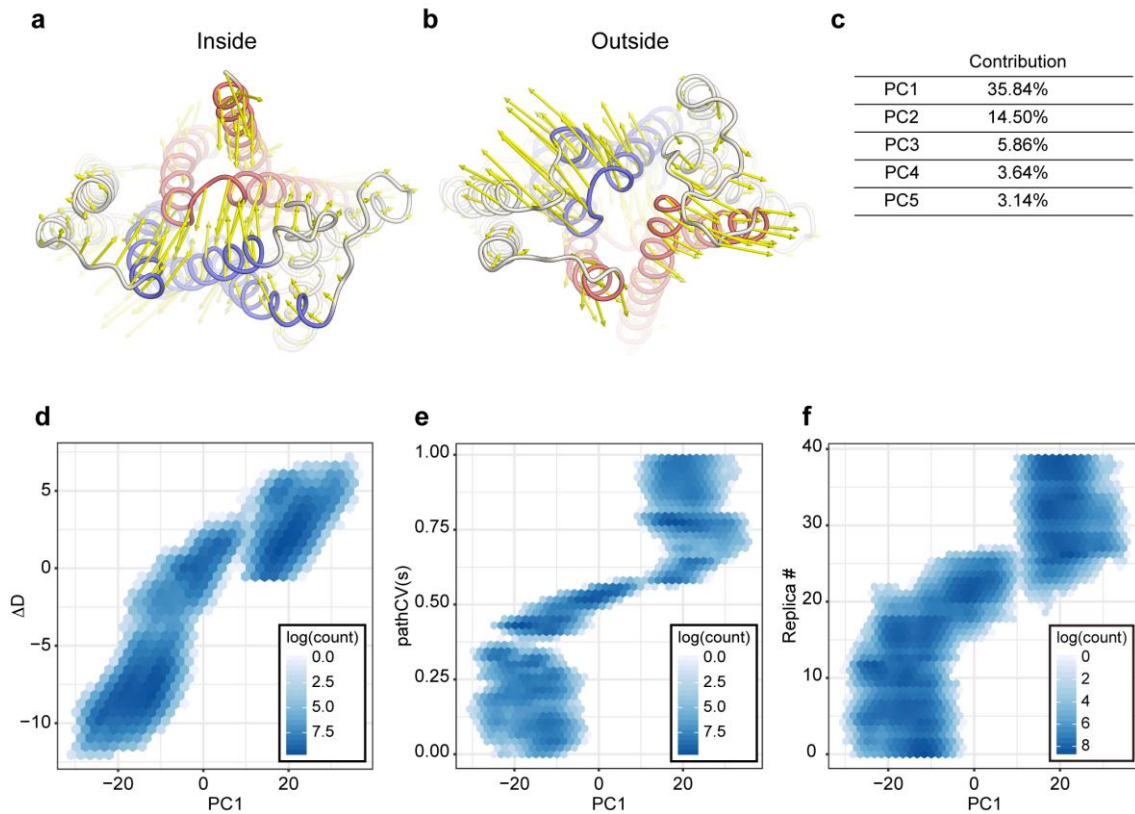

878

879 **Figure 2—figure supplement 3 | The visualization of PCA results and**  
880 **correlations with other variables**

881 (a, b) Vector representation of the eigenvector of the first principal component  
882 (PC1) of GsGPT movement, calculated by principal component analysis (PCA). (c) The  
883 contributions of PC1-5 for the overall deviations. (d-f) Correlations of the PC1 vs. (d)  
884  $\Delta D$ , (e) the number of replicas and (f) the pathCV(s) shown in a 2D histogram. The  
885 count value is shown in a log scale.

886

887

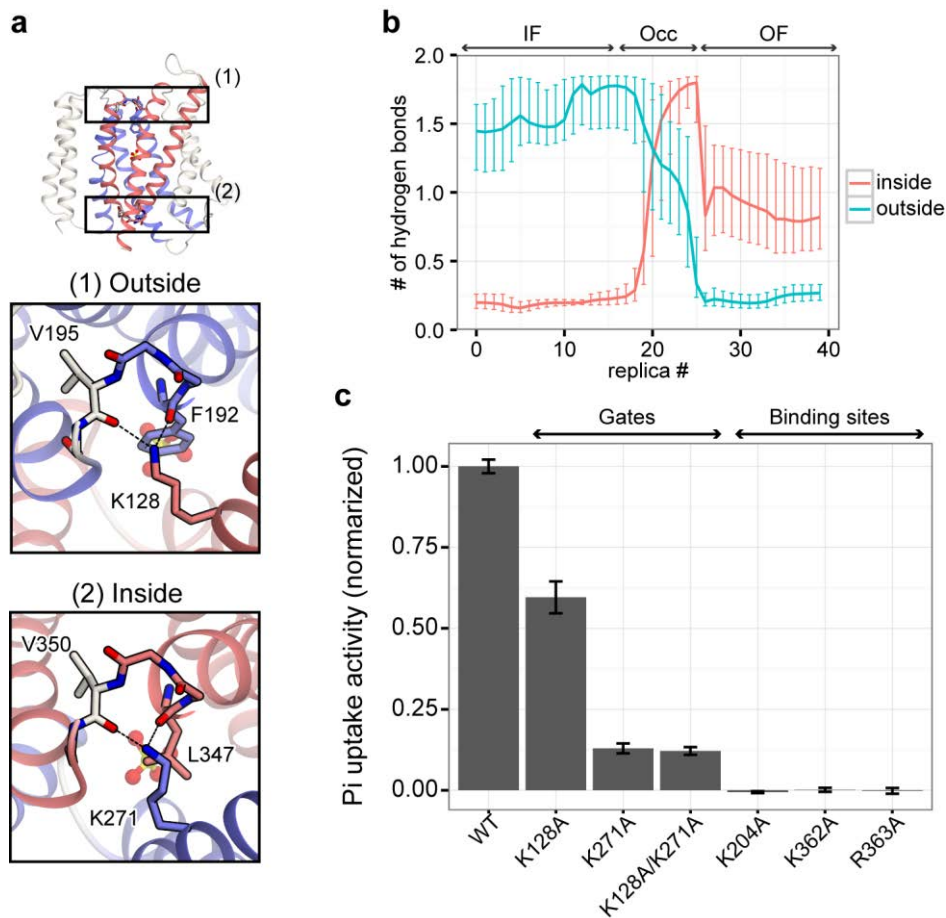

888 **Figure 3 | Hydrogen bonds at the inside and outside gates**

889 (a) Overall structure of GsGPT (upper) and close-up views of the outside  
890 (center) and inside (lower) gates. The dotted line represents a hydrogen bond between a  
891 Lys residue and a main chain carbonyl atom. (b) The number of hydrogen bonds in the  
892 inside and outside gates (magenta and cyan, respectively), shown in panel a. The  
893 median value in each replica is plotted. Error bars represent the interquartile range  
894 (IQR). (c) Liposome-based mutational analysis. The levels of [ $^{32}$ P]-P<sub>i</sub> uptake by GsGPT  
895 mutants were normalized with the mean value of the wild-type. The error bars represent  
896 s.e.m. (n=3-9; see Figure 3—Source Data1). The values of K204A, K362A and R363A  
897 are from our previous study(Lee et al., 2017).  
898

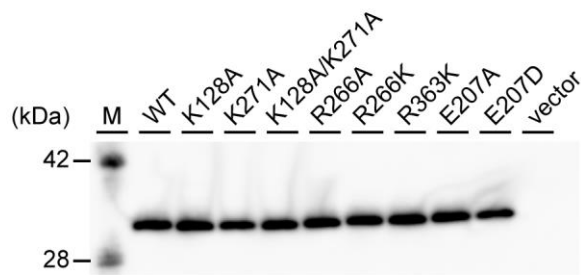

899 **Figure 3—figure supplement 1 | Membrane expression of GsGPT mutants**

900 Western blotting analysis for wild type (WT) and each GsGPT mutant,  
901 confirming the comparable expression levels. “M” represents marker lane.

902

903



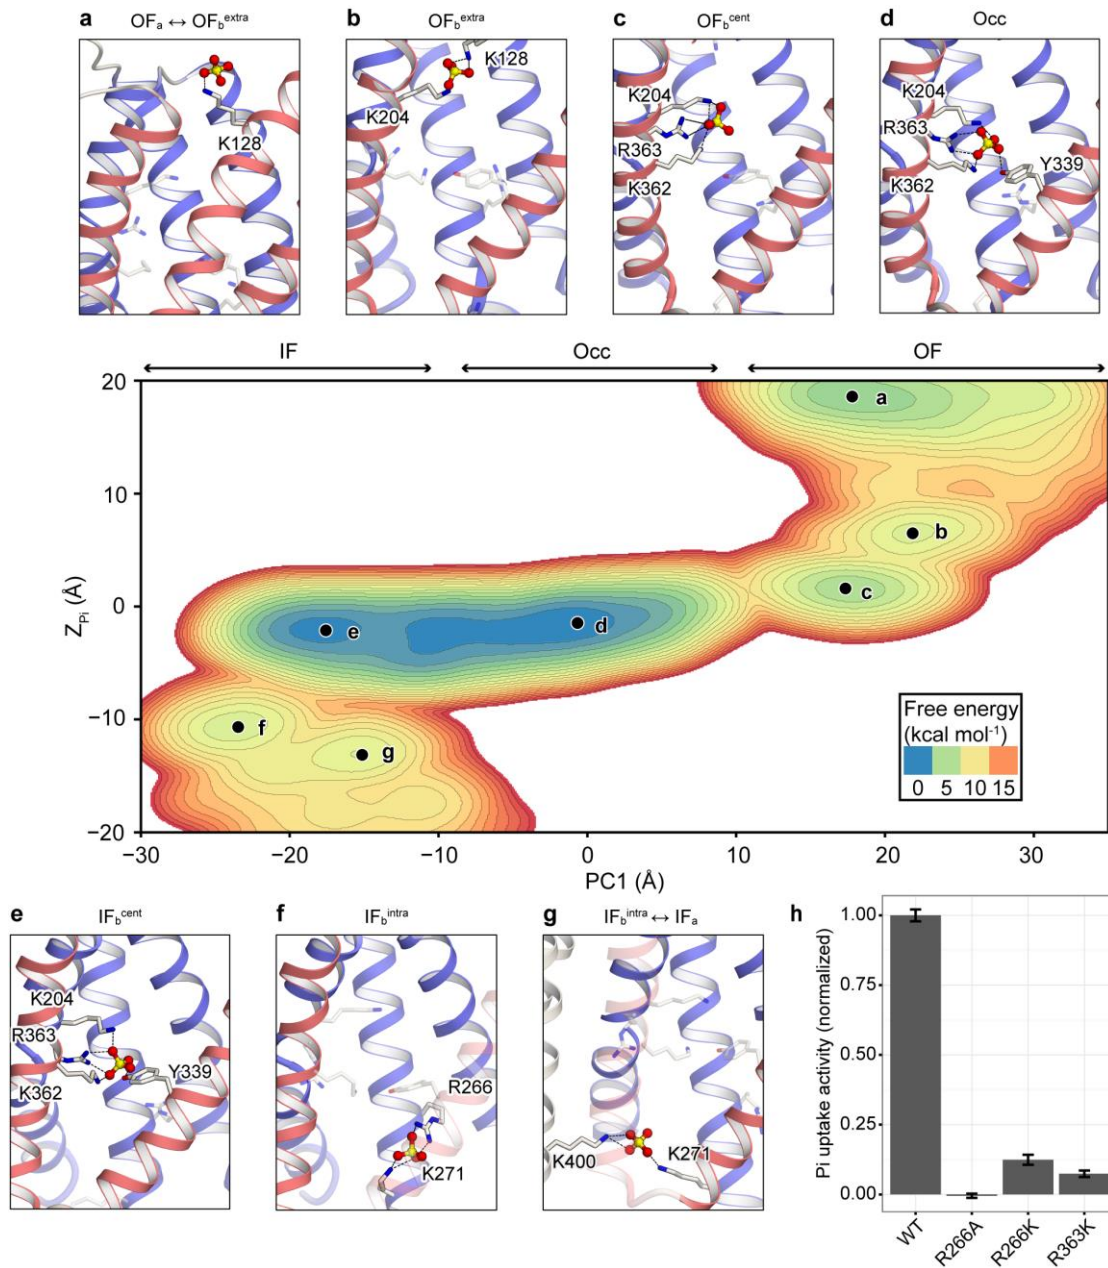

904

905 **Figure 4 | Substrate binding and global conformational change coupling**

906 Free energy landscape in the (PC1,  $Z_{Pi}$ ) space is shown for the regions in which  
 907  $P_i$  is bound to GsGPT. (a-g) Snapshots of the binding site conformation corresponding  
 908 to each free energy basin. The residues that directly interact with  $P_i$  in the transport  
 909 cycle are shown with stick models. Dotted lines represent strong interactions in which

910 the distance between P<sub>i</sub> and each residue is less than 3.0 Å. TM1 is not shown, except in  
911 panel a. (h) Liposome-based mutational analysis. The levels of [<sup>32</sup>P]- P<sub>i</sub> uptake by  
912 GsGPT mutants were normalized with the mean value of the wild-type. The error bars  
913 represent s.e.m. (n=3-9; see Figure 3—Source Data1).

914

915

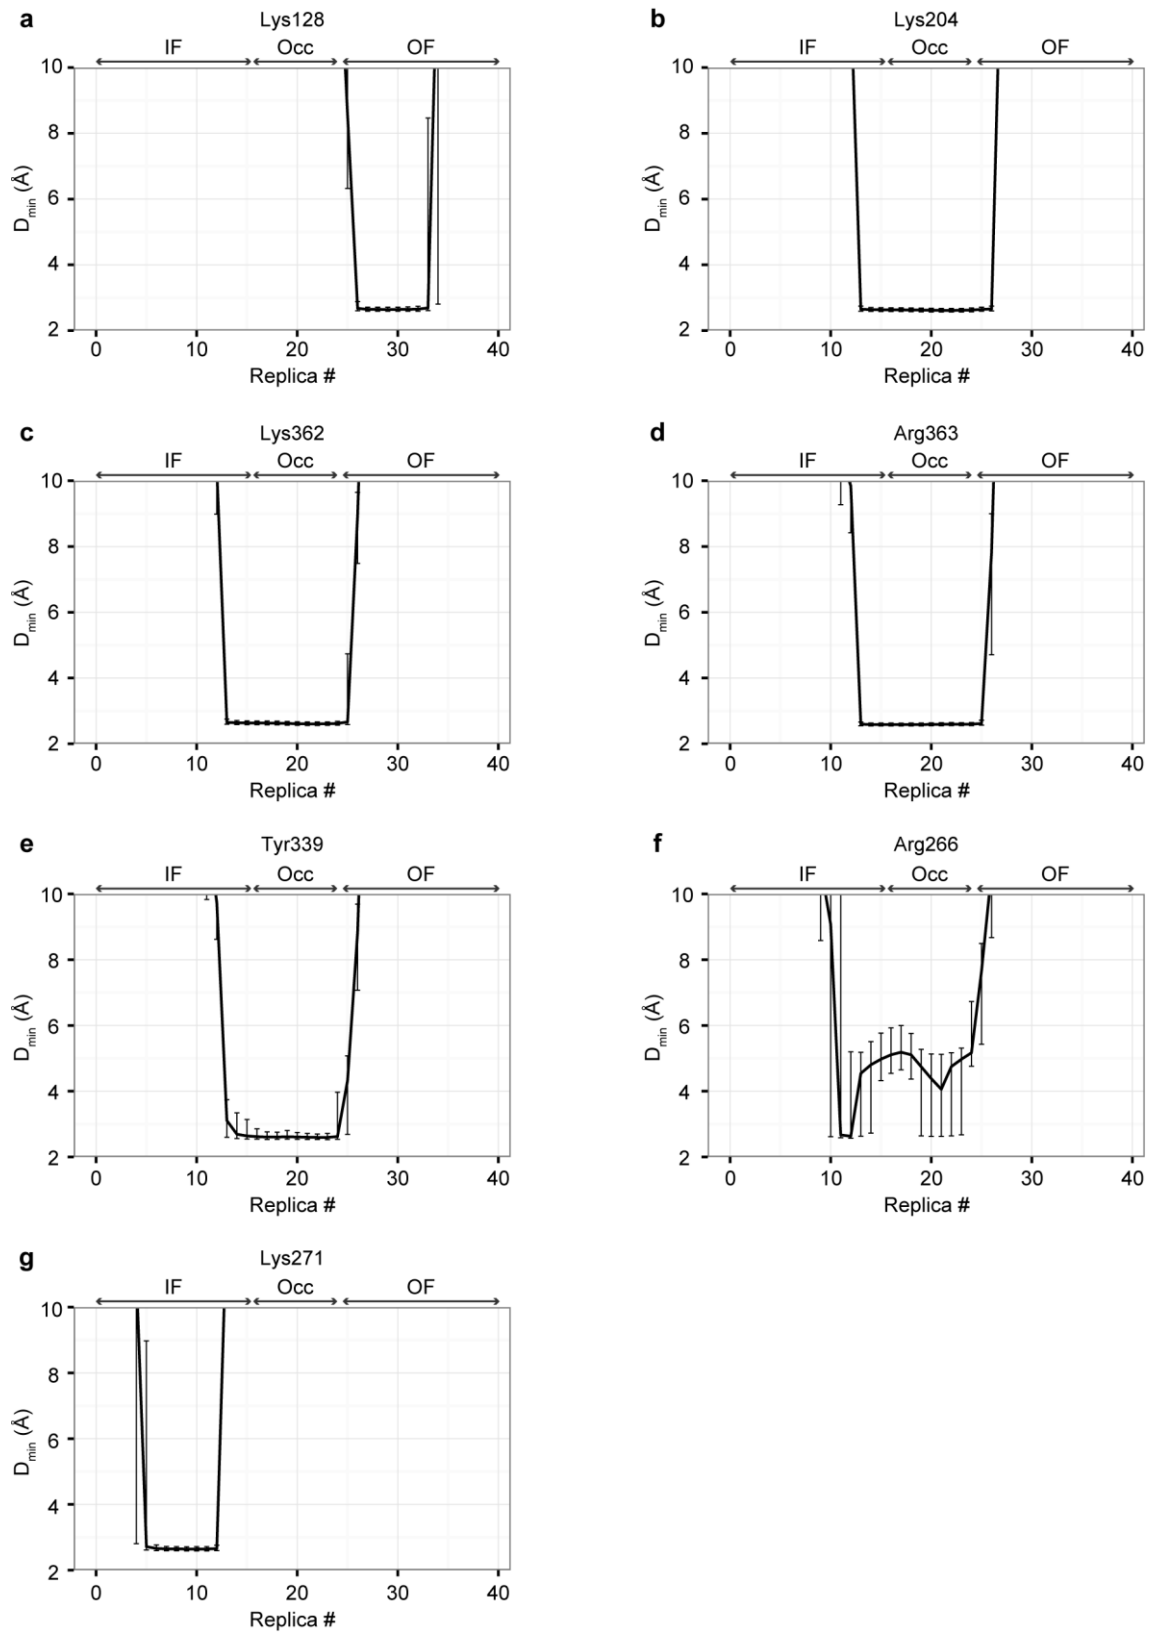

916

917 **Figure 4—figure supplement 1 | Minimum distances between  $P_i$  and the  $P_i$**

918 **interacting residues**

919           The minimum distances between  $P_i$  and the  $P_i$  interacting residues, (a) Lys128,  
920 (b) Lys204, (c) Lys362, (d) Arg363, (e) Tyr339, (f) Arg266 and (g) Lys271. The median  
921 value within each replica is plotted, and the error bars represent the interquartile range  
922 (IQR).

923

924

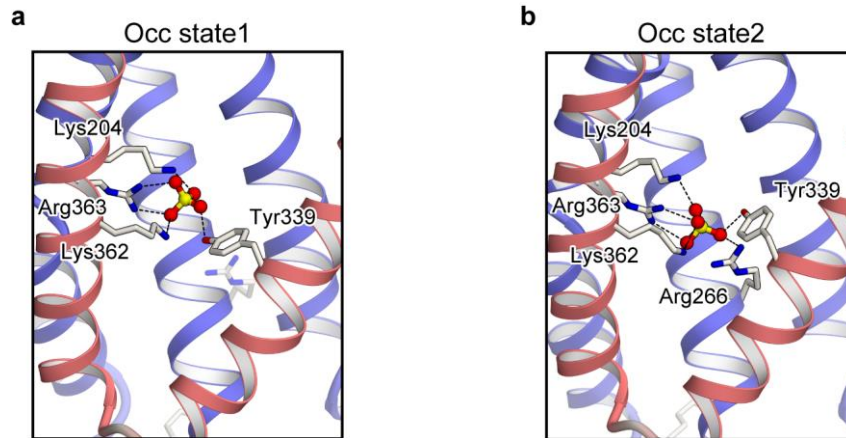

925 **Figure 4—figure supplement 2 | Degenerate states in the Occ conformation**

926 (a, b) Close-up views of the substrate binding site for two conformations  
927 corresponding to the free energy basins shown in Figure 4d. TM1 is not shown.

928

929

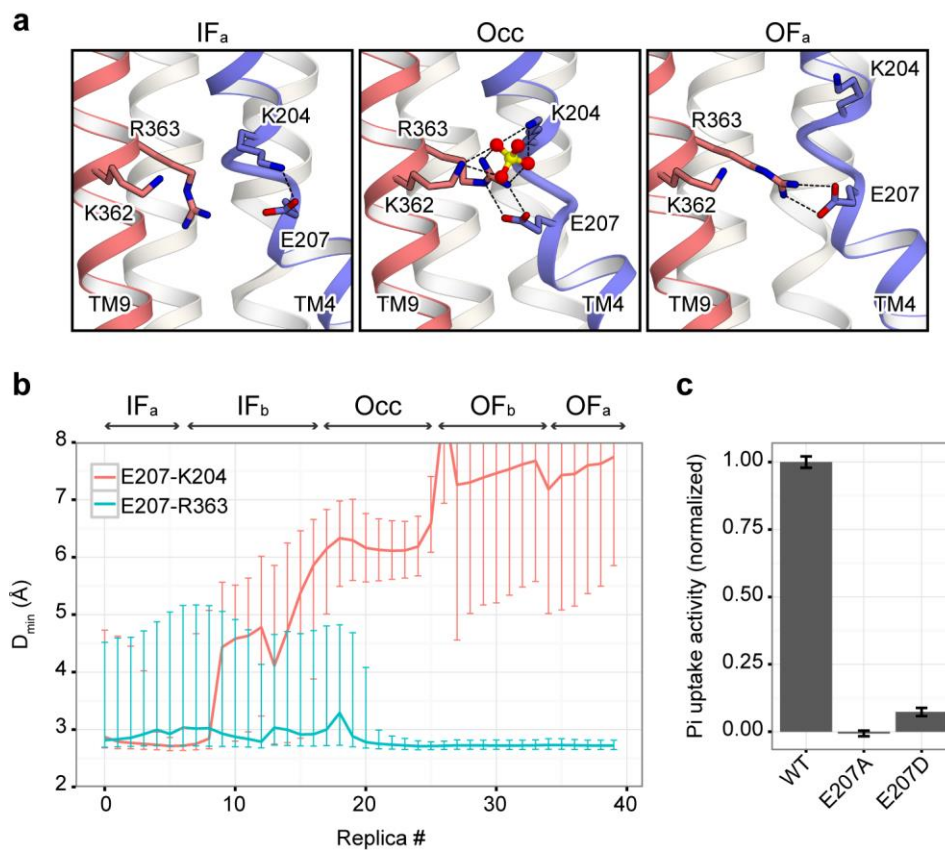

930 **Figure 5 | E207 in the substrate binding site**

931 (a) Close-up view of the substrate binding site for representative structures of IF,  
932 Occ and OF. Dotted lines represent strong salt bridge interactions, in which the distance  
933 between each atom is less than 3.5 Å. (b) Minimum distance between Glu207 and  
934 Lys204 (magenta) and between Glu207 and Arg363 (cyan). The median value of the  
935 distance in each replica is plotted, and the error bars represent the interquartile range  
936 (IQR). (c) Liposome-based mutational analysis. The levels of [<sup>32</sup>P]-P<sub>i</sub> uptake by GsGPT  
937 mutants were normalized with the mean value of the wild-type. The error bars represent  
938 s.e.m. (n=3-9; see Figure 3—Source Data1).

939

940

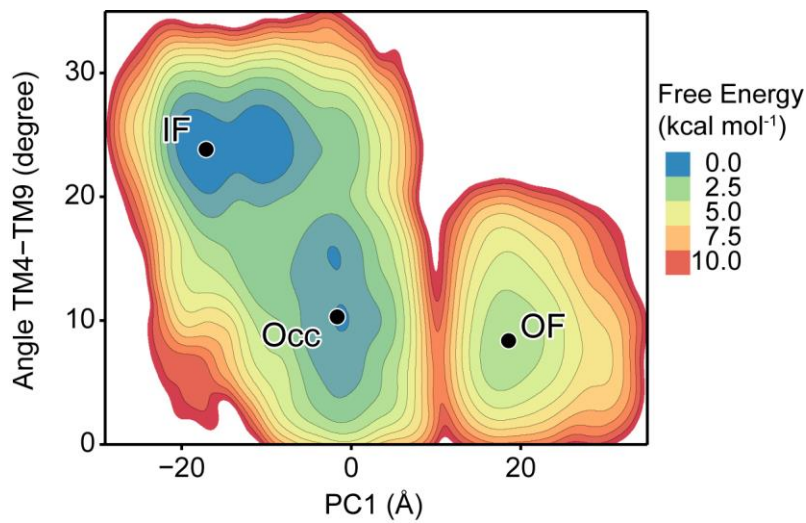

941 **Figure 5—figure supplement 1 | Free energy landscape for inter-helical**  
942 **angle between TM4 and TM9**

943 Free energy landscape in terms of (PC1, TM4-TM9 angle) space. PC1 represents  
944 the first principal component of all C $\alpha$  atoms, and the inter-helical angle between TM4  
945 and TM9 was calculated using the roll axis of the helix (obtained from the principal axis  
946 component analysis for the C $\alpha$  atoms).

947

948

949 **Tables**

950 **Table 1 | simulation set list**

| Sim # | Transition                                                                                                      | Method  | Collective variable | # of replicas x sim time |
|-------|-----------------------------------------------------------------------------------------------------------------|---------|---------------------|--------------------------|
| 1     | cryst. $\rightarrow$ IF <sub>b</sub> <sup>cent</sup>                                                            | non-Eq. | $\Delta D$          | 10 ns                    |
| 2     | IF <sub>b</sub> <sup>cent</sup> $\rightarrow$ OF <sub>b</sub> <sup>cent</sup>                                   | non-Eq. | $\Delta D$          | 20 ns                    |
| 3     | IF <sub>b</sub> <sup>cent</sup> $\rightarrow$ IF <sub>b</sub> <sup>intra</sup>                                  | non-Eq  | Z <sub>Pi</sub>     | 10 ns                    |
| 4     | OF <sub>b</sub> <sup>cent</sup> $\rightarrow$ OF <sub>b</sub> <sup>extra</sup>                                  | non-Eq  | Z <sub>Pi</sub>     | 10 ns                    |
| 5     | IF <sub>b</sub> <sup>intra</sup> $\rightleftharpoons$ Occ $\rightleftharpoons$ OF <sub>b</sub> <sup>extra</sup> | SMwST   | $\Delta D / Z_{Pi}$ | 40 x 1.2 ns = 48 ns      |
| 6     | IF <sub>b</sub> <sup>intra</sup> $\rightleftharpoons$ Occ $\rightleftharpoons$ OF <sub>b</sub> <sup>extra</sup> | BEUS    | pathCV(s)           | 20 x 20 ns = 400 ns      |
| 7     | IF <sub>b</sub> <sup>cent</sup> $\rightarrow$ IF <sub>a</sub>                                                   | non-Eq. | Z <sub>Pi</sub>     | 25 ns                    |
| 8     | IF <sub>b</sub> <sup>cent</sup> $\rightarrow$ IF <sub>a</sub>                                                   | BEUS    | Z <sub>Pi</sub>     | 16 x 20 ns = 320 ns      |
| 9     | OF <sub>b</sub> <sup>cent</sup> $\rightarrow$ OF <sub>a</sub>                                                   | non-Eq. | Z <sub>Pi</sub>     | 25 ns                    |
| 10    | OF <sub>b</sub> <sup>cent</sup> $\rightarrow$ OF <sub>a</sub>                                                   | BEUS    | Z <sub>Pi</sub>     | 16 x 20 ns = 320 ns      |
| 11    | IF <sub>a</sub> $\rightleftharpoons$ Occ $\rightleftharpoons$ OF <sub>a</sub>                                   | SMwST   | $\Delta D / Z_{Pi}$ | 40 x 5.5 ns = 220 ns     |
| 12    | IF <sub>a</sub> $\rightleftharpoons$ Occ $\rightleftharpoons$ OF <sub>a</sub>                                   | BEUS    | pathCV(s)           | 40 x 50 ns = 2000 ns     |
|       |                                                                                                                 |         | total               | ~ 3.4 $\mu$ s            |

951

952



953 **Rich media files**

954 **Video1**

955 IF-to-OF conformational transition of GsGPT, viewed from the plane of the  
956 membrane. The trajectory was reconstructed by the *post-hoc* string method (PHSM)  
957 from the final bias-exchange umbrella sampling (BEUS) simulation (simulation set 12).  
958 The P<sub>i</sub> molecule is shown with a ball-and-stick model, and the major substrate binding  
959 basic residues and Glu207 are highlighted with stick models. The coloring scheme for  
960 the TM helices is the same as in Figure 1.

961

962 **Source Data**

963 **Figure 3—Source Data1 | List of the raw count values of transport assay**

964

965

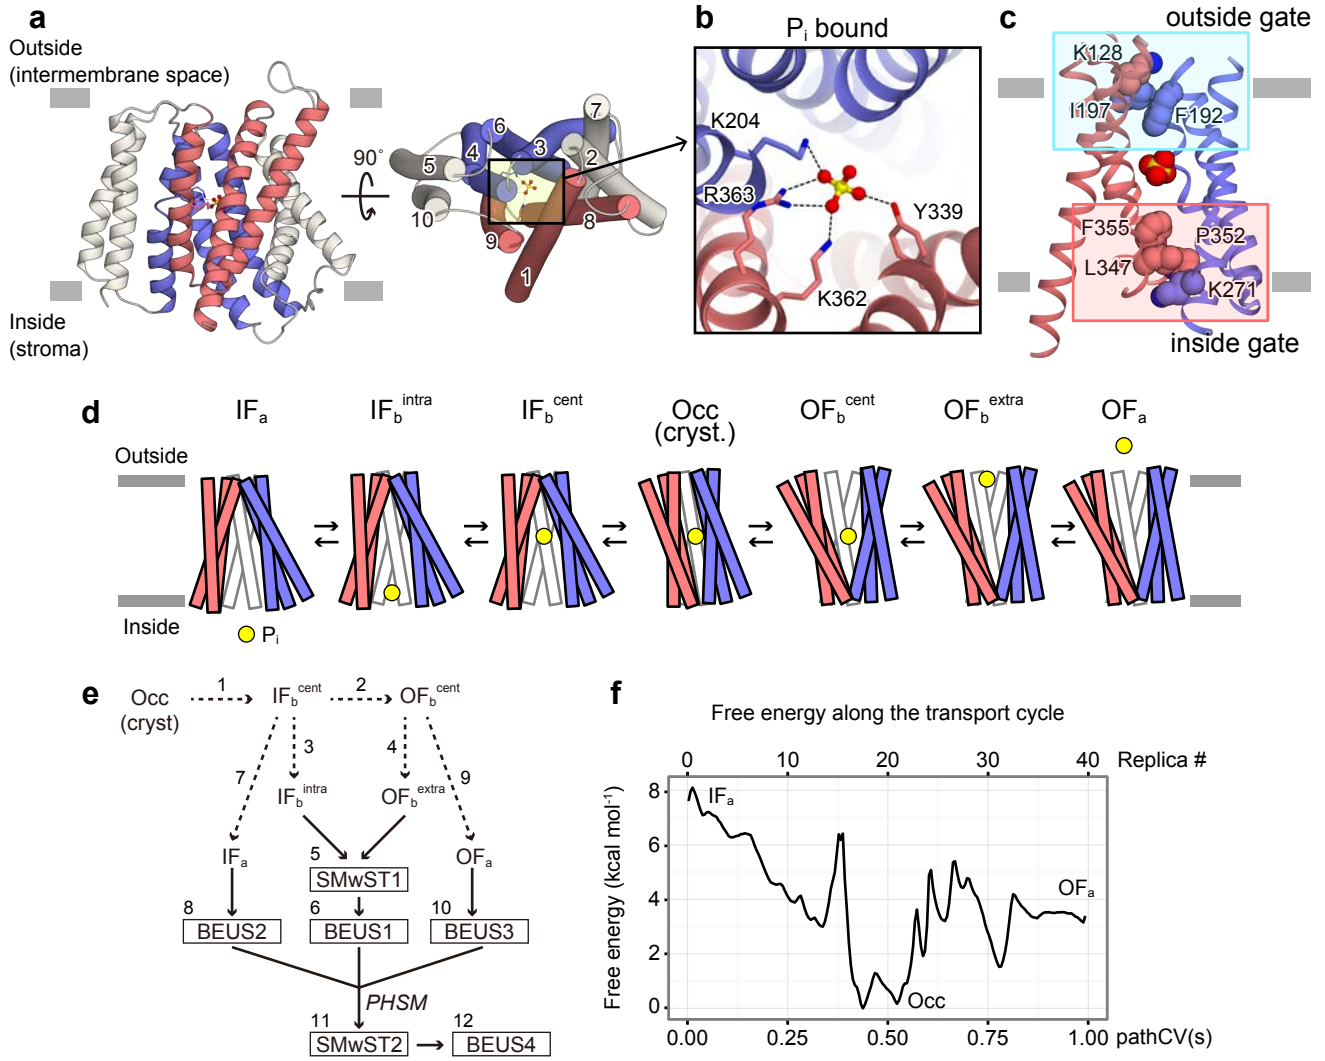

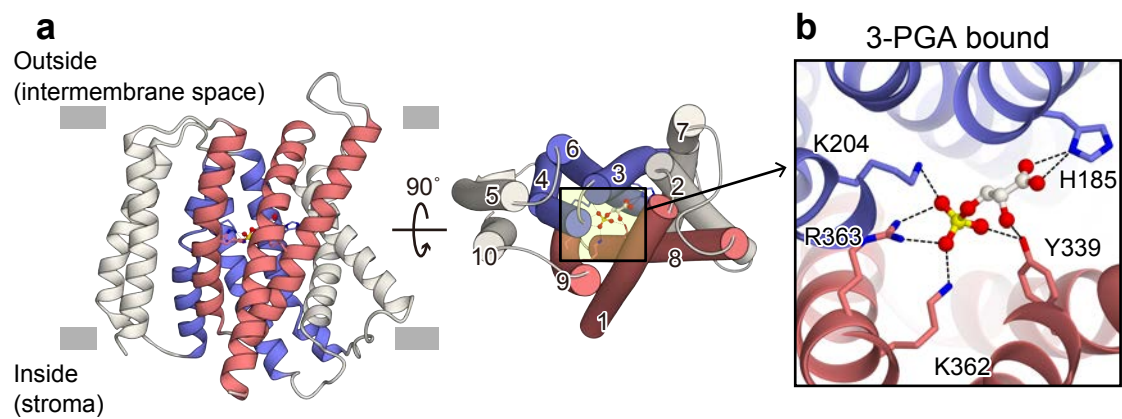

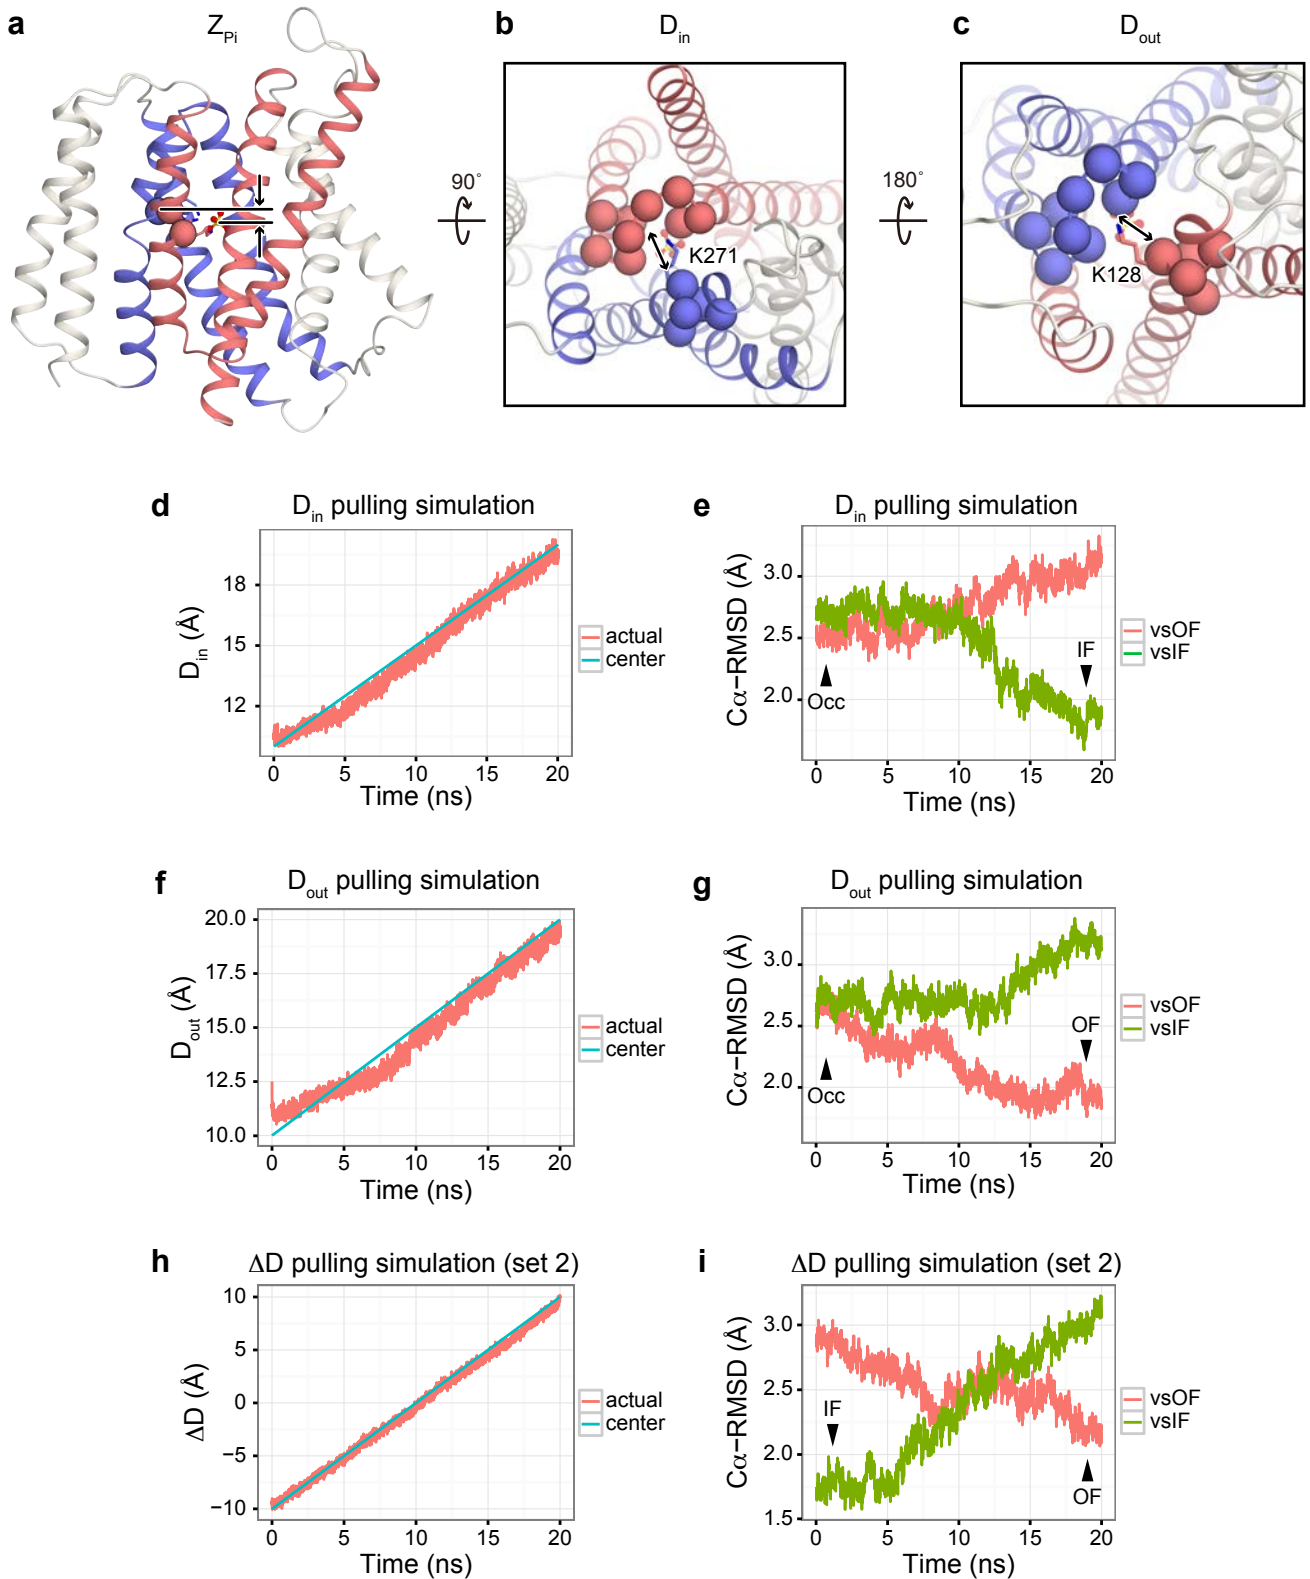

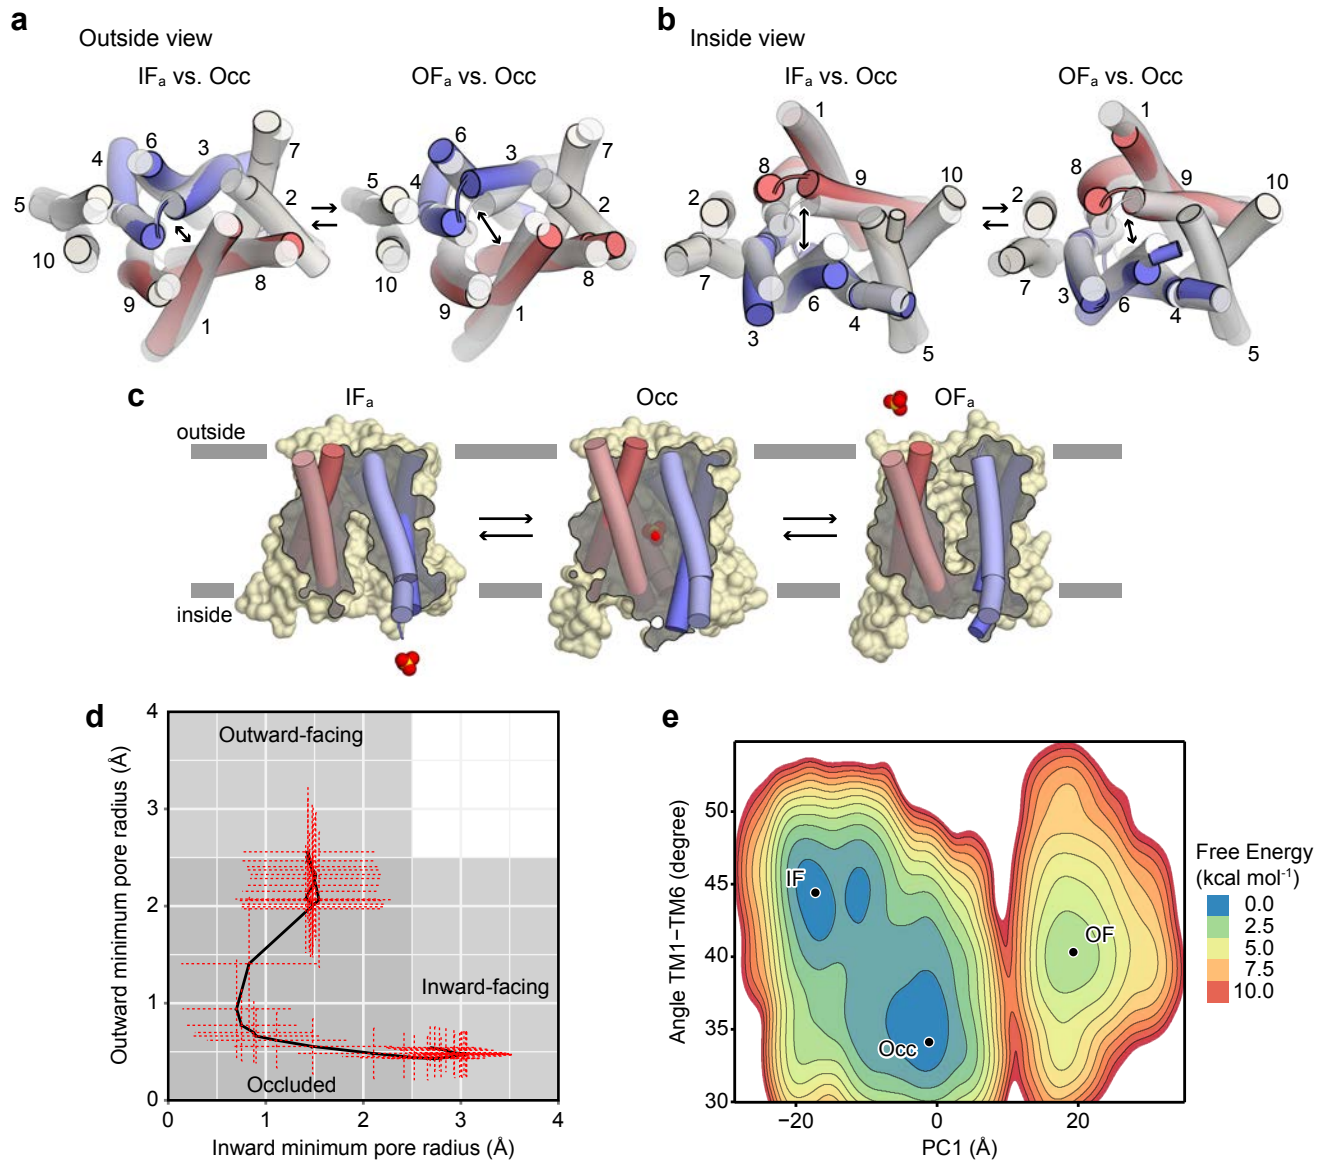

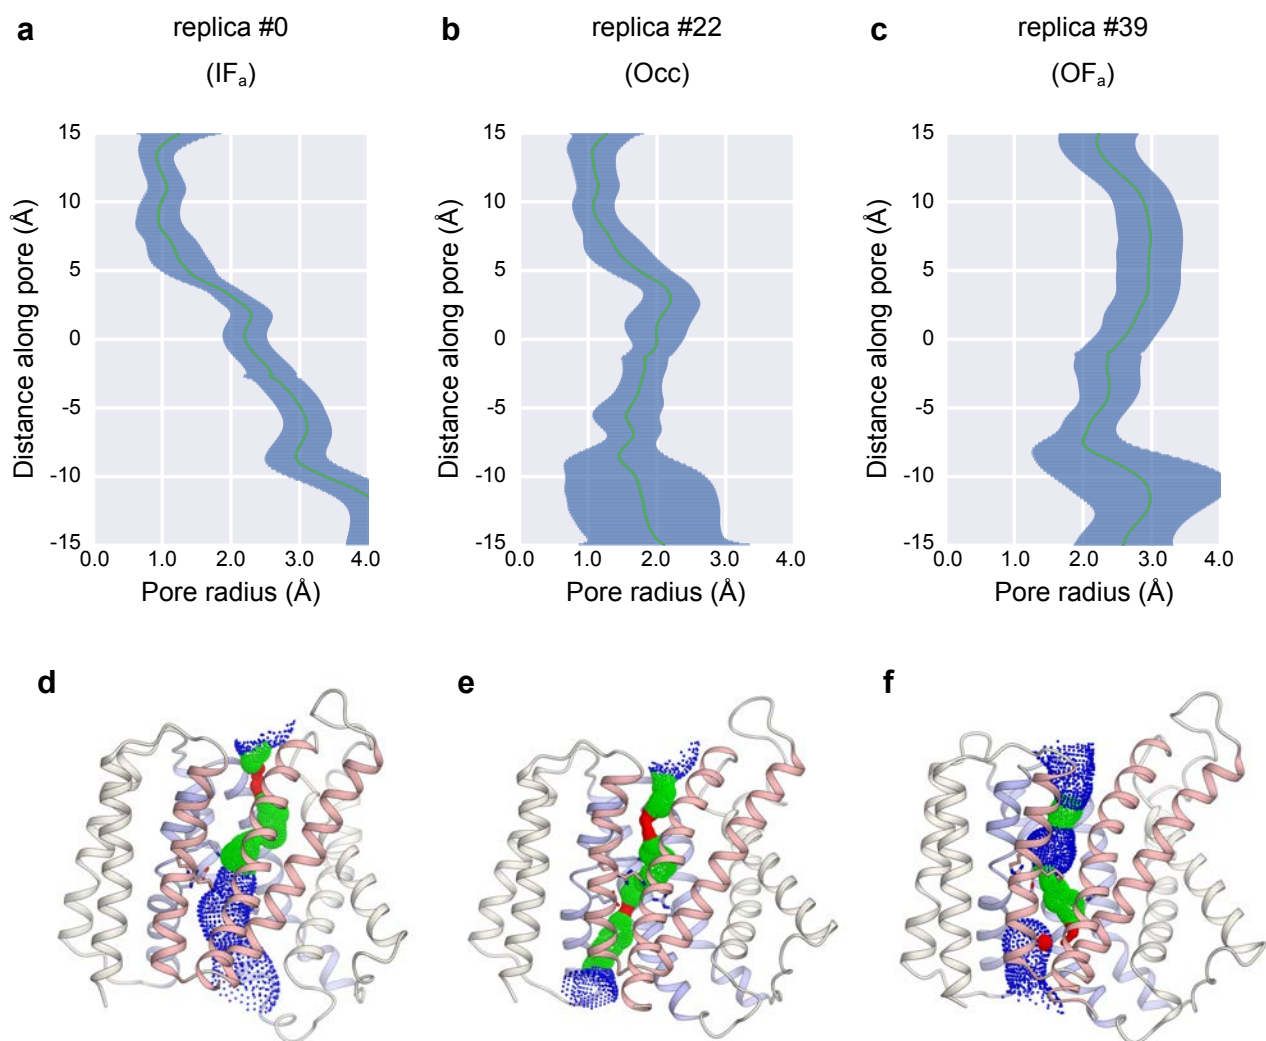

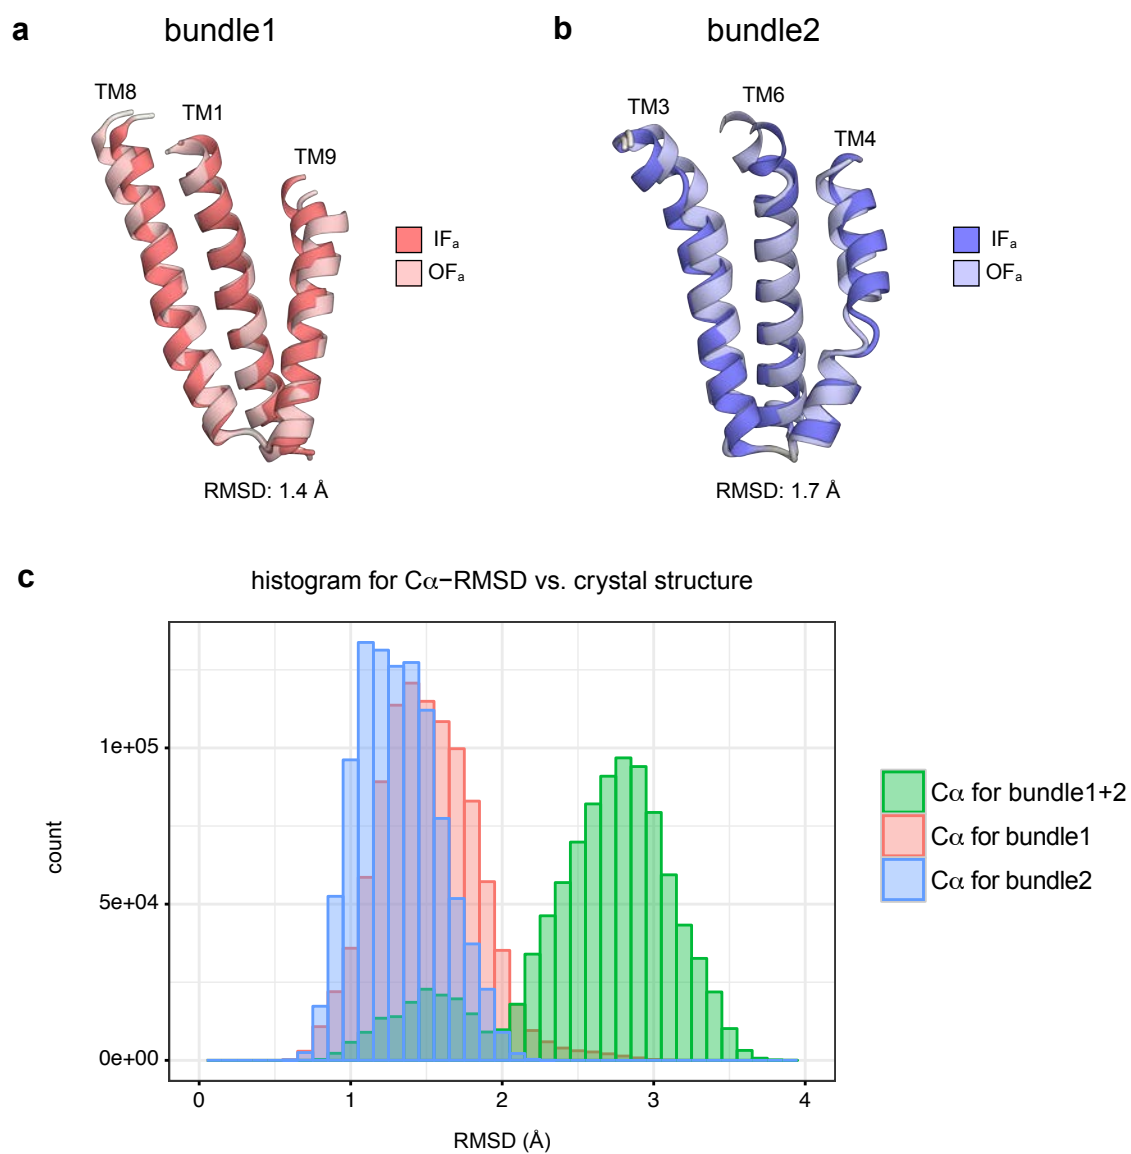



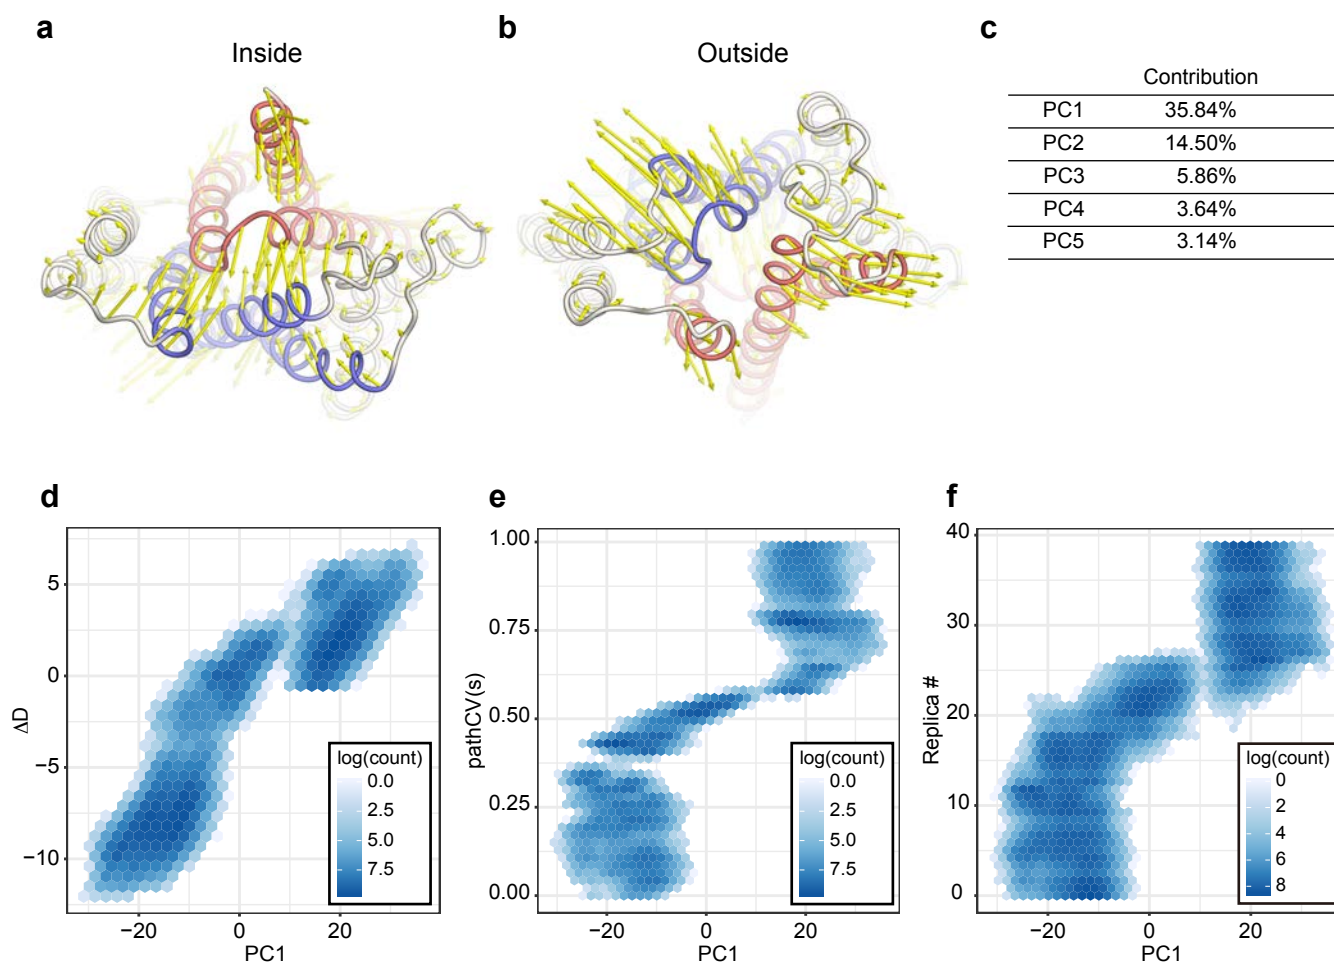

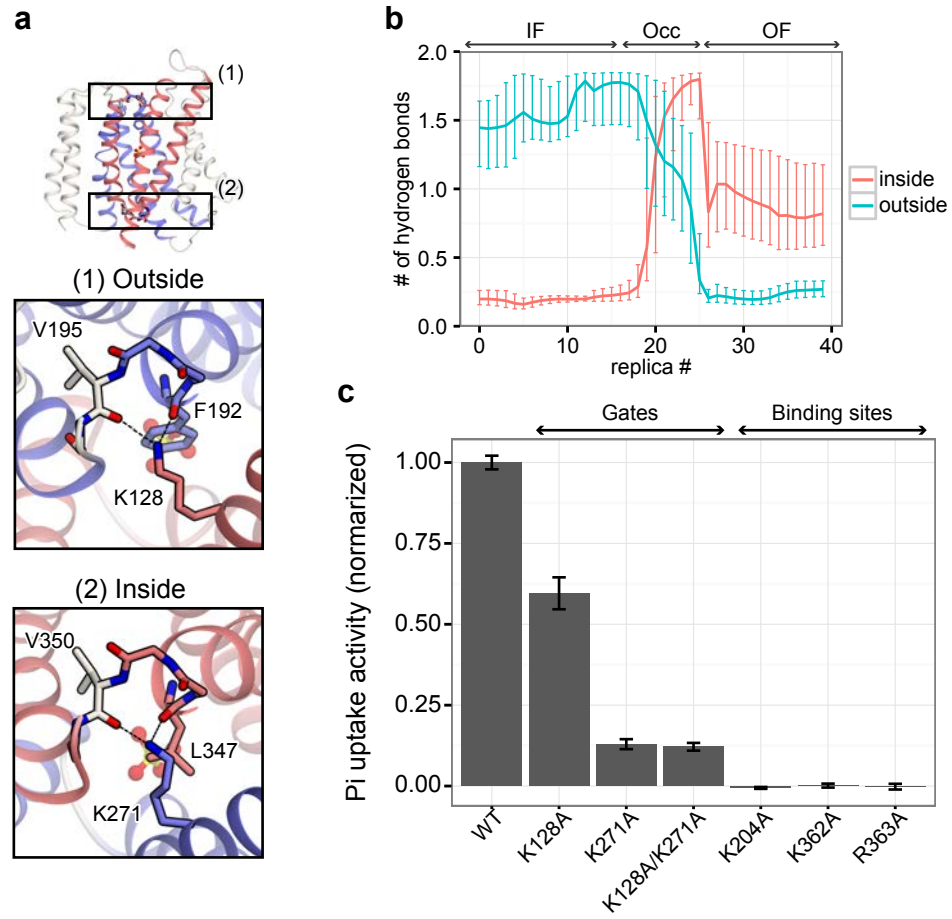



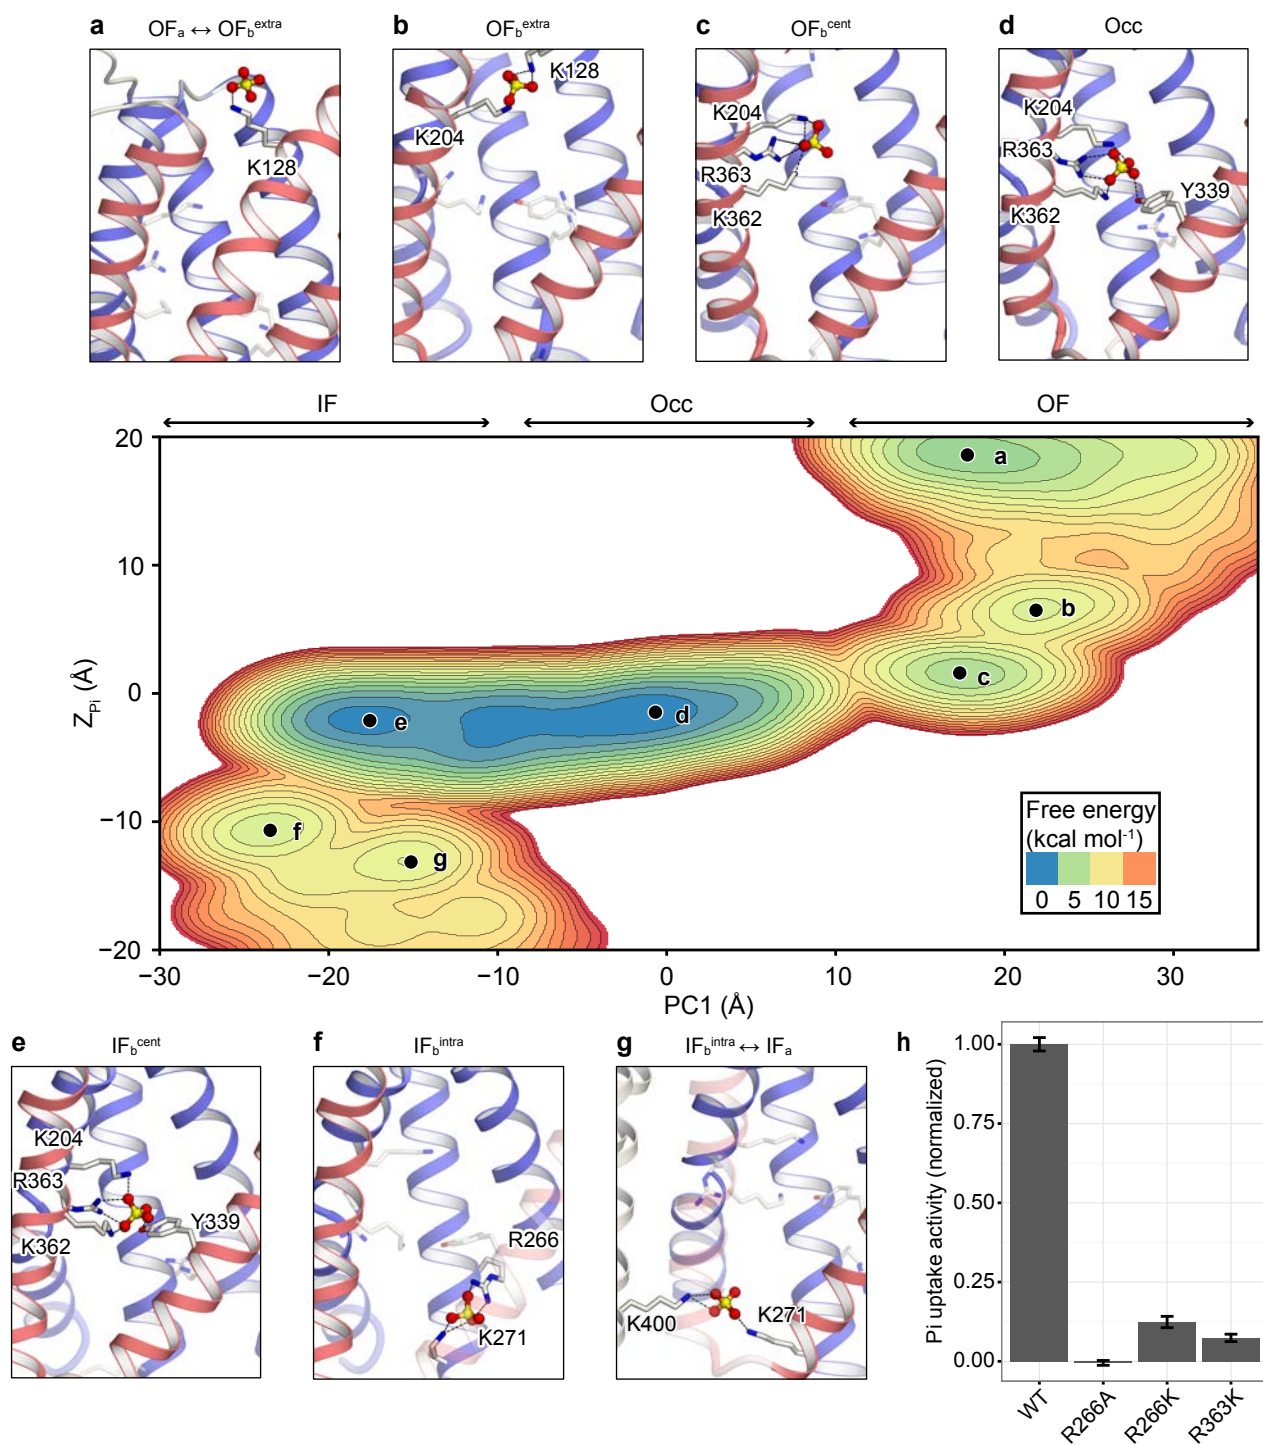

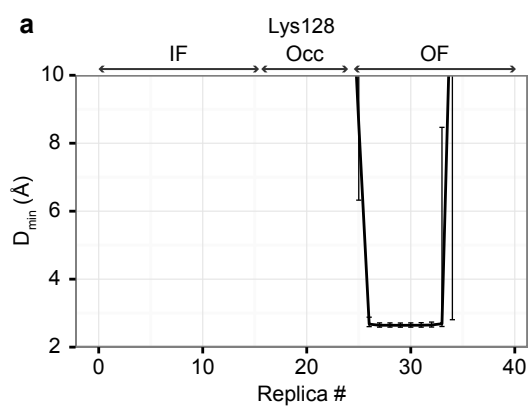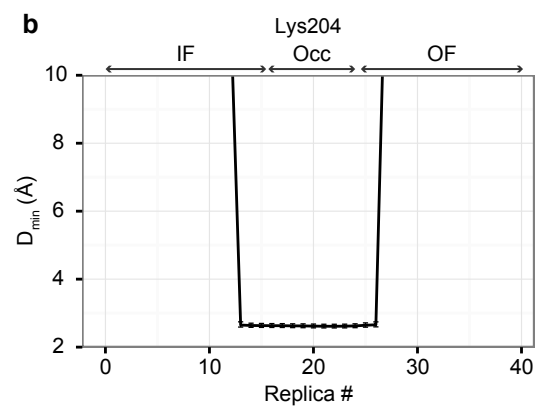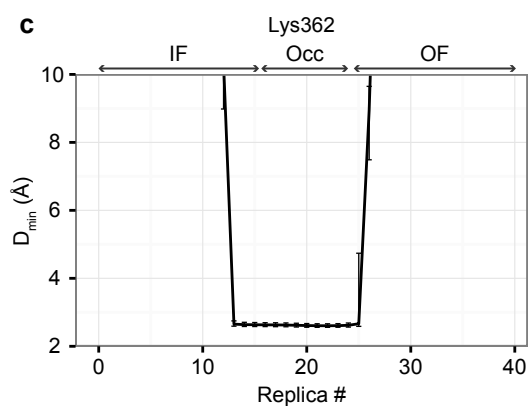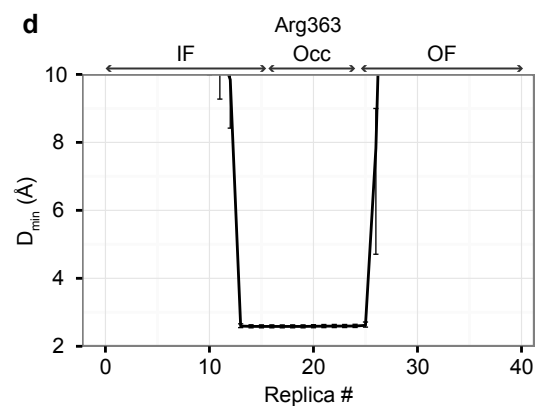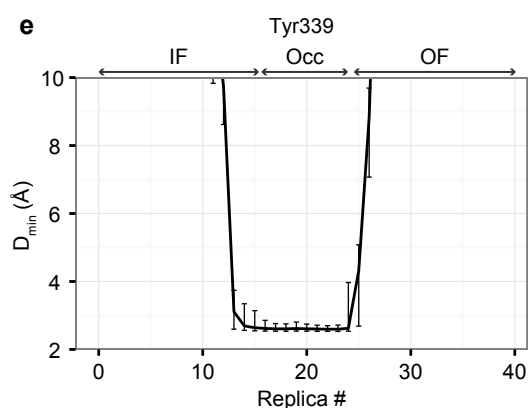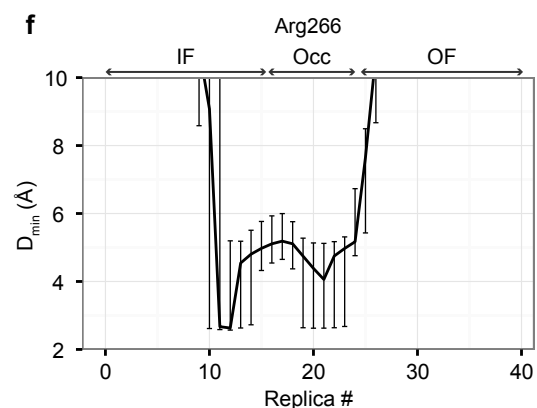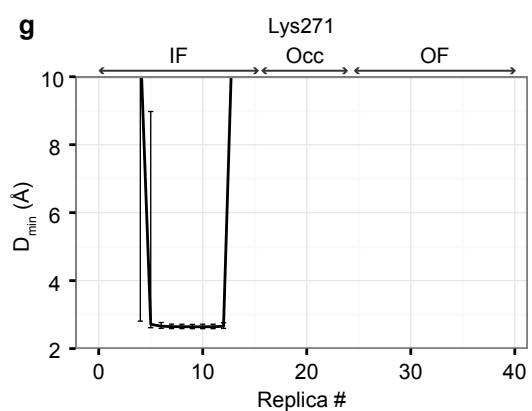

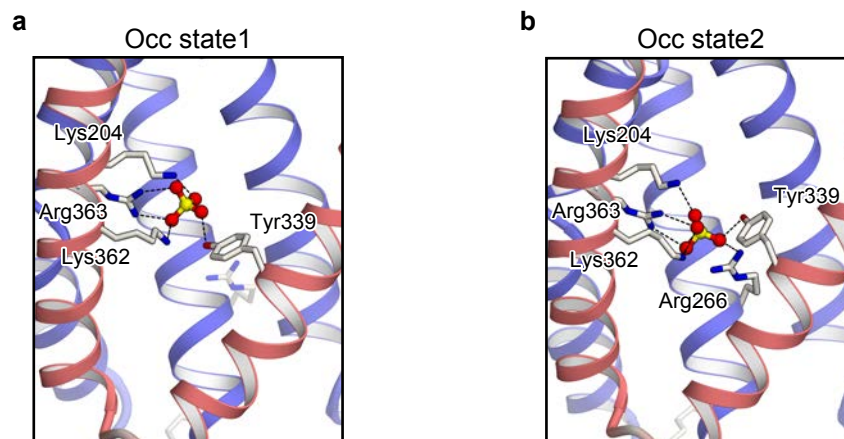

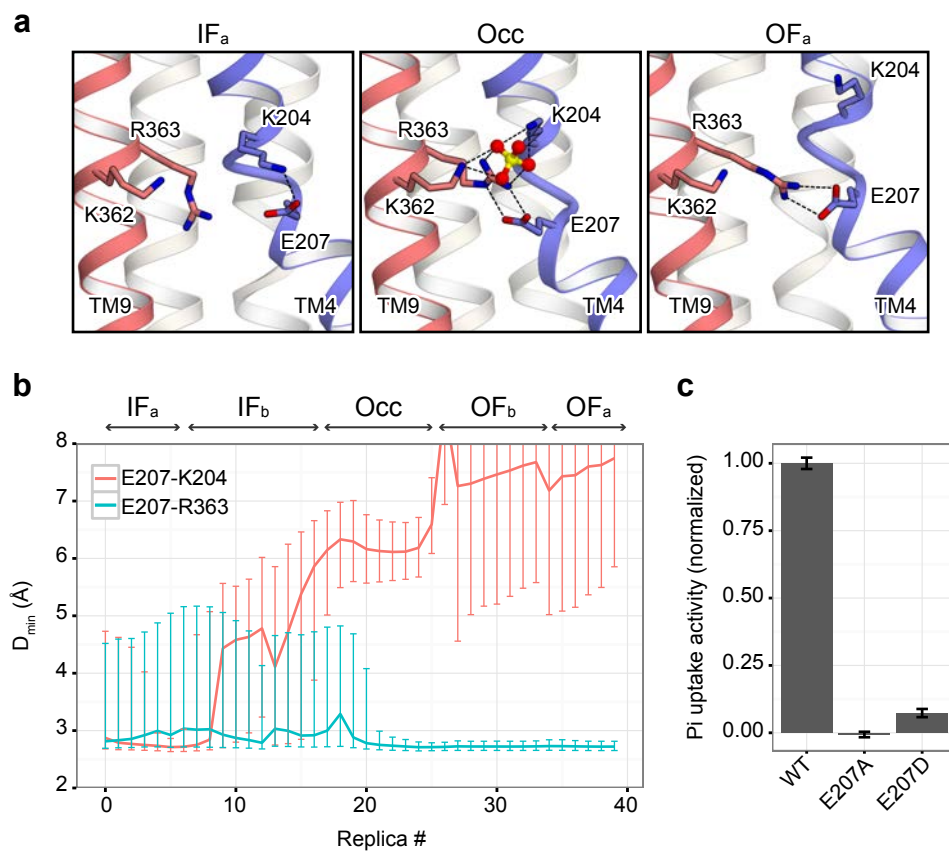

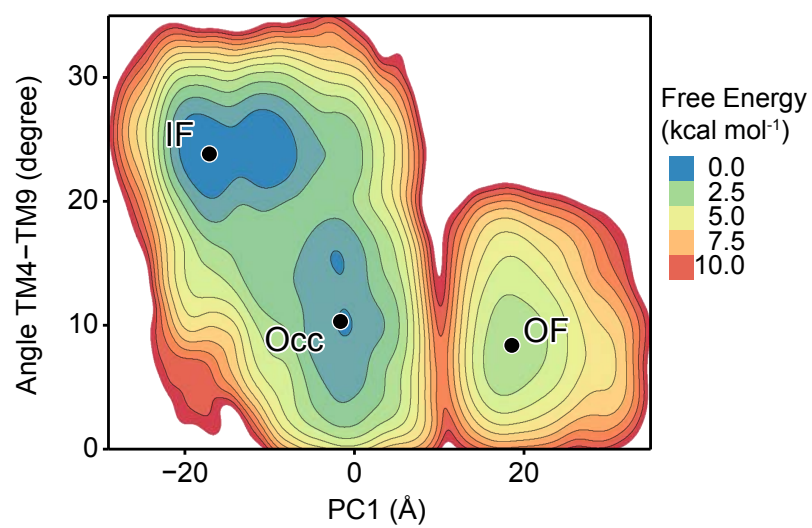

Source: http://biorxiv.org/content/10.1101/206912v1.full.pdf
